# Supplementary material for: Synthesis of Novel Shikonin Derivatives and Pharmacological Effects of Cyclopropylacetylshikonin on Melanoma Cells
Source: PubMed Central journal article supplement (PMC6278577; doi:10.3390/molecules23112820), 2018-10-30
Supplement: molecules-23-02820-s001.pdf [file molecules-23-02820-s001.pdf]

1 *Supplementary Material*

2 **Synthesis of novel shikonin derivatives and**  
3 **pharmacological effects of cyclopropylacetylshikonin**  
4 **on melanoma cells**

5 **Christin Durchschein**<sup>1</sup>, **Antje Hufner**<sup>2</sup>, **Beate Rinner**<sup>3</sup>, **Alexander Stallinger**<sup>3</sup>, **Alexander Deutsch**<sup>4</sup>,  
6 **Birgit Lohberger**<sup>5</sup>, **Rudolf Bauer**<sup>1\*</sup>, **Nadine Kretschmer**<sup>1</sup>

7 <sup>1</sup> Institute of Pharmaceutical Sciences, Department of Pharmacognosy, University of Graz, Universitaetsplatz 4,  
8 8010 Graz, Austria

9 <sup>2</sup> Institute of Pharmaceutical Sciences, Department of Pharmaceutical Chemistry, University of Graz,  
10 Universitaetsplatz 1, 8010 Graz, Austria

11 <sup>3</sup> Division of Biomedical Research, Medical University of Graz, Roseggerweg 48, 8036 Graz, Austria

12 <sup>4</sup> Division of Hematology, Medical University of Graz, Auenbruggerplatz 15, 8036 Graz, Austria

13 <sup>5</sup> Department of Orthopedics and Trauma, Medical University Graz, Auenbruggerplatz 5, 8036 Graz, Austria

14 \* **Correspondence:** [rudolf.bauer@uni-graz.at](mailto:rudolf.bauer@uni-graz.at); **Tel.:** +43 316 380 8700

15

16

---

17 **Content**

18 1. Studies on the enantiomeric purity and associated pharmacological effects of **1**

19 2. NMR-spectra (<sup>1</sup>H and <sup>13</sup>C or HMBC) of novel shikonin derivatives **2-10** and **12-20**

20 3. Syntheses of cycloalkylidenacetic acids **2a** to **5a** and cyclobutylacetic acid (**7a**)

21 4. <sup>1</sup>H NMR-spectra of synthesized acids

22 5. HPLC runs of synthesized compounds

23 6. Results of the XTT assay of compounds **1-20**

## 24 1. Studies on the enantiomeric purity and associated pharmacological effects of 1

25 Shikonin and derivatives possess a chiral center in the side chain. In nature, the enantiomeric  
 26 ratios of shikonin (*R*-isomer) and alkannin (*S*-isomer) varies. Therefore, we determined the optical  
 27 purity of the isolated shikonins as well as synthesized derivatives by chiral HPLC.

### 28 1.1. General

29 Chiral separations were performed using an Agilent 1100 Series Liquid Chromatograph (Agilent  
 30 Technologies, Waldbronn, Germany) equipped with an autosampler and a VWL detector. UV-data  
 31 were collected at 520 nm. Experiments were carried out at ambient temperature under isocratic  
 32 conditions with a flow rate of 1.0 ml/min and an injection volume of 15  $\mu$ l. Data evaluation was  
 33 performed using a ChemStation for LC 3D Systems Rev. B. 04.03 (Agilent Technologies, Waldbronn,  
 34 Germany) software. A Chiralcel OD, 250 x 4.6 mm, 3.5  $\mu$ m from Daicel Chemical Industries (Osaka,  
 35 Japan) served as CSP with immobilized cellulose tris (3,5-dimethylphenylcarbamate) as chiral selector.  
 36 Mobile phase consisted of *n*-hexane / 2-propanol = 3 : 1 (v/v).

### 37 1.2. Identification of shikonin and alkannin

38 An authentic sample of previously isolated **1** [8] was hydrolyzed with diluted sodium hydroxide  
 39 solution [S1]. Chiral HPLC [S2] of the isolated product revealed 70% shikonin and 30% alkannin. The  
 40 shikonin batch supplied from Chengdu Biopurify Phytochemicals Ltd., Chengdu, People's Republic of  
 41 China, which was also used for syntheses, and, in addition, an alkannin lot supplied from Chengdu  
 42 Push Bio-Technology Co. Ltd., Chengdu, People's Republic of China were submitted to the same  
 43 analysis. Shikonin turned out to consist of 100% *R*-isomer, alkannin was almost a racemate (*R* : *S* = 49 :  
 44 51).

#### 46 References:

47 S1: Pekin, G.; Ganzera, M.; Senol, S.; Bedir, E.; Korkmaz, K.S.; Stuppner, H. Determination of Naphthazarin  
 48 Derivatives in Endemic Turkish Alkanna Species by Reversed Phase High Performance Liquid  
 49 Chromatography. *Planta Med* **2007**, *73*, 267-272, DOI: 10.1055/s-2007-967110.

51 S2: Ikeda, Y.; Ishida, N.; Fukaya, C.; Yokoyama, K.; Tabata, M.; Fukui, H.; Honda, G. Determination of the Ratio  
 52 between Optical Isomers, Shikonin and Alkannin by High Performance Liquid Chromatography Analysis.  
 53 *Chem Pharm Bull* **1991**, *39*, 2351-2153.

### 55 1.3. Determination of enantiomeric purity of $\beta,\beta$ -dimethylacrylshikonin samples

56 To investigate the influence of the chiral center on the cytotoxicity, different hydrolysates of **1**  
 57 were prepared and analyzed in accordance to the method above (Table S1). These investigations also  
 58 show that the enantiomeric ratio did not change during synthesis.

59 **Table S1:** Enantiomeric ratios of samples of **1**. Racemic  $\beta,\beta$ -dimethylacrylshikonin was prepared by  
 60 acylation of racemic shikonin/alkannin mixture with  $\beta,\beta$ -dimethylacrylic acid according to the  
 61 procedure in the plain text.

| Source of <b>1</b>                     | Ratio of enantiomers (after hydrolysis)       |
|----------------------------------------|-----------------------------------------------|
| Isolated from <i>O. paniculata</i> [8] | 70% <i>R</i> -isomer and 30% <i>S</i> -isomer |
| synthesized from 100% shikonin         | 100% <i>R</i> -isomer                         |
| synthesized from alkannin              | 49% <i>R</i> -isomer and 51% <i>S</i> -isomer |

62

63

64

65 1.4. Influence of enantiomeric purity of **1** on cytotoxicity

66 Cytotoxicity was investigated using WM164 melanoma cells and pure *R*-isomer, 49% *R*-isomer  
67 and two 70:30 mixtures of *R*-isomer (a: mixture of 100% and 49% *R*-isomer to yield 70/30; b: isolated  
68 **1**). Melanoma cells were treated with these compounds up to 10.0  $\mu\text{M}$  and 72 h of incubation (Figure  
69 S1). We did not detect significant differences in the cytotoxicity indicating that the chiral center as well  
70 as the synthesis process has no influence on the activity.

71

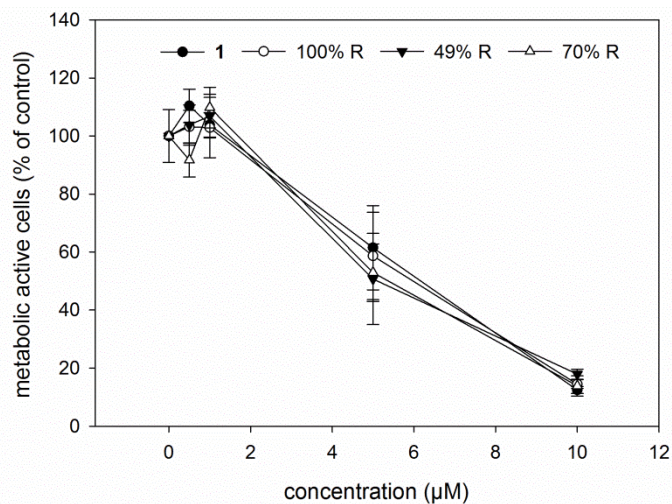

72

73 **Figure S1.** Cytotoxicity of the isolated **1** compared to 100% synthesized *R*-isomer of **1** (100% R), 49% *R*-  
74 isomer (49% R) and “mixed” 70% *R*-isomer (70% R) as determined by the XTT viability assay and after  
75 72 h incubation with different concentration of the compounds (WM164 cells, mean  $\pm$  sem,  $n = 6$ ).

76 **2. NMR-spectra ( $^1\text{H}$  and  $^{13}\text{C}$  or HMBC) of the new shikonin derivatives 2 to 10 and 12 to 20**

77  $^1\text{H}$  and  $^{13}\text{C}$  NMR spectra were recorded on Varian 400 MHz UnityINOVA spectrometer (400 and  
78 100 MHz, respectively) using deuterated chloroform ( $\text{CDCl}_3$ ) as solvent and TMS as internal standard.

79 After acylation of shikonin, the side chain was proven by NMR: The  $^1\text{H}$  NMR signal of H-1' of the  
80 side chain was shifted from 4.92 ppm in shikonin to 6.0 - 6.1 ppm in the esters 2 to 20, whereas, the  
81 signals of the aromatic and the phenolic hydrogen atoms remained almost constant. In the HMBC  
82 spectra a cross peak from ester carbonyl carbon to H-1' of the shikonin moiety proves the esterification  
83 at the side chain of shikonin.

84

85 *NMR-Spectra:*

86  $^1\text{H}$ -NMR spectrum of (R)-1-(1,4-dihydro-5,8-dihydroxy-1,4-dioxonaphthalen-2-yl)-4-methylpent-3-  
87 enyl 2-cyclobutylidenacetate (2):

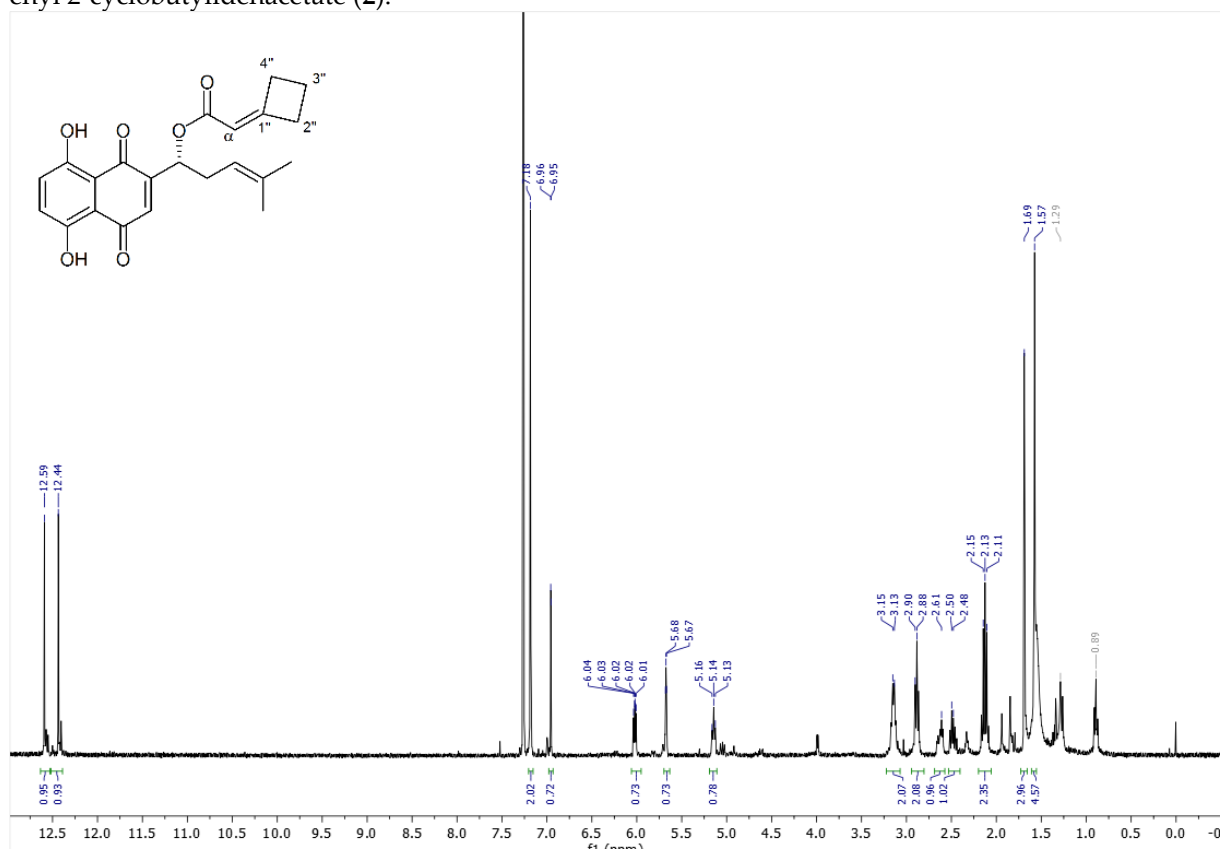

88

89

- 90 HMBC spectrum of (*R*)-1-(1,4-dihydro-5,8-dihydroxy-1,4-dioxonaphthalen-2-yl)-4-methylpent-3-enyl  
91 2-cyclobutylidenacetate (2):

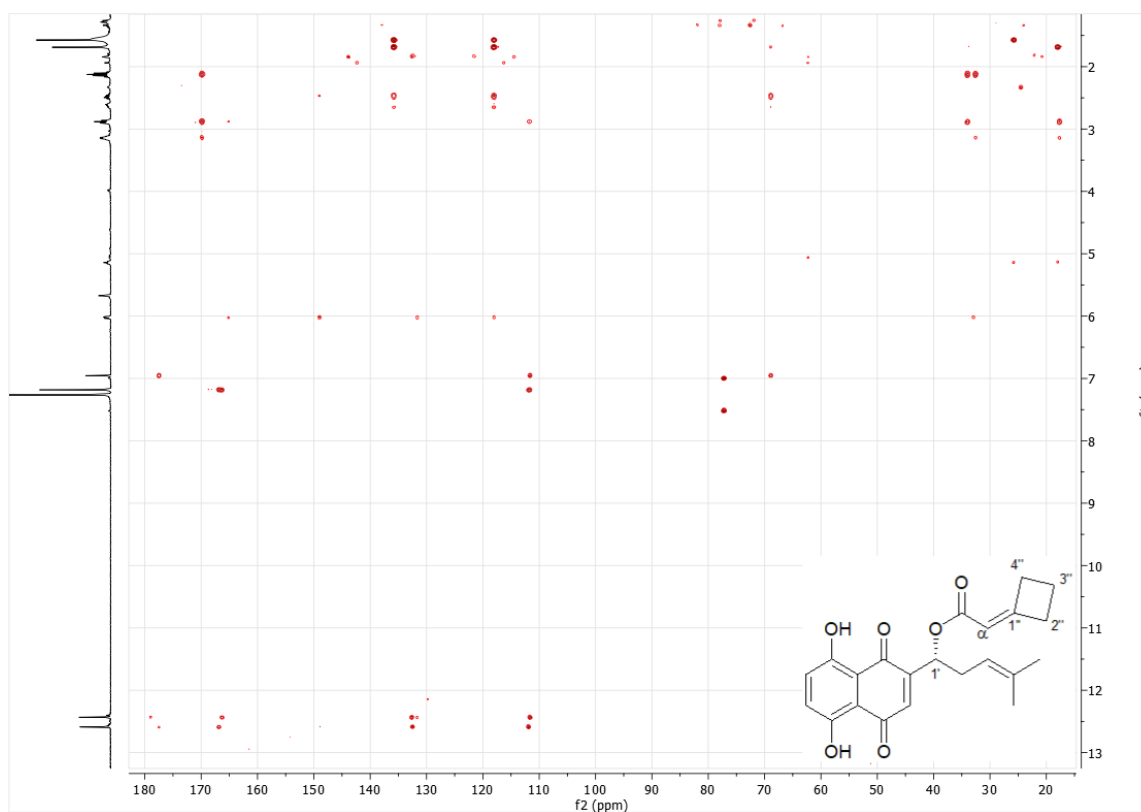

- 92  
93 <sup>1</sup>H-NMR spectrum of (*R*)-1-(1,4-dihydro-5,8-dihydroxy-1,4-dioxonaphthalen-2-yl)-4-methylpent-3-  
94 enyl 2-cyclopentylidenacetate (3):

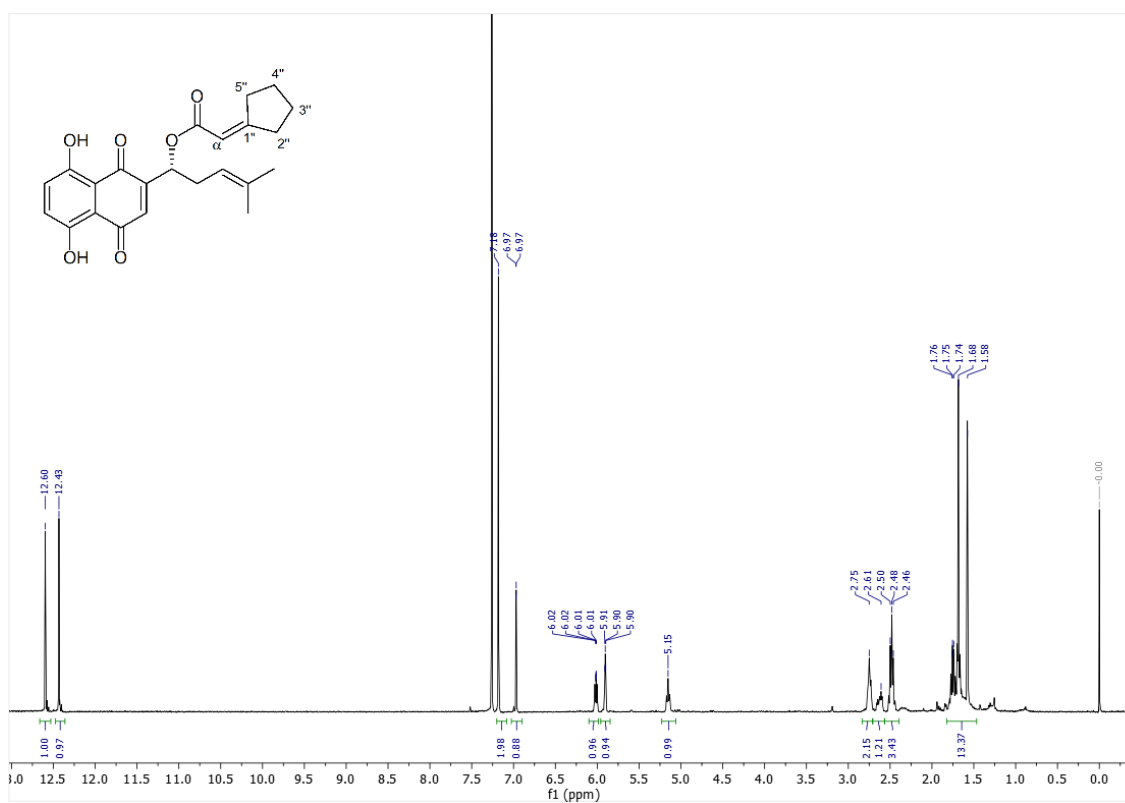

95

96  $^{13}\text{C}$ -NMR spectrum of (*R*)-1-(1,4-dihydro-5,8-dihydroxy-1,4-dioxonaphthalen-2-yl)-4-methylpent-3-  
97 enyl 2-cyclopentylidenacetate (3):

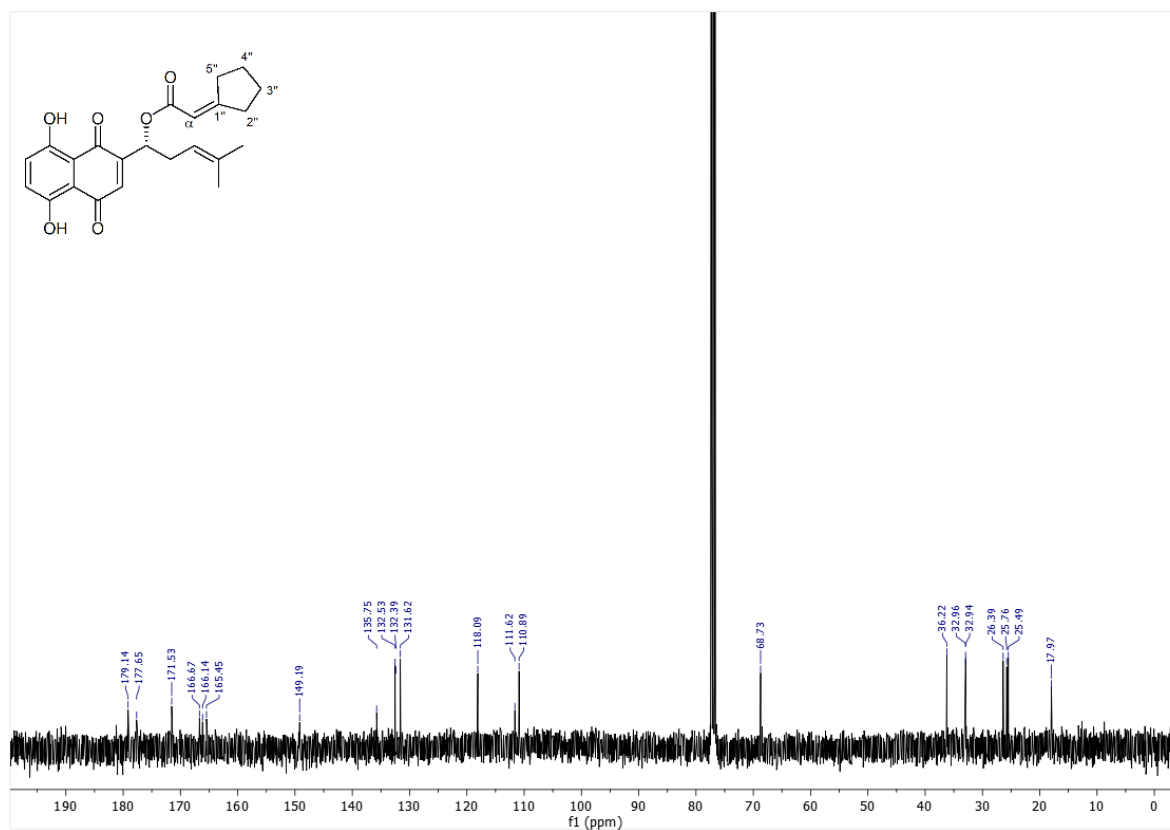

99 HMBC spectrum of (*R*)-1-(1,4-dihydro-5,8-dihydroxy-1,4-dioxonaphthalen-2-yl)-4-methylpent-3-enyl  
100 2-cyclopentylidenacetate (3):

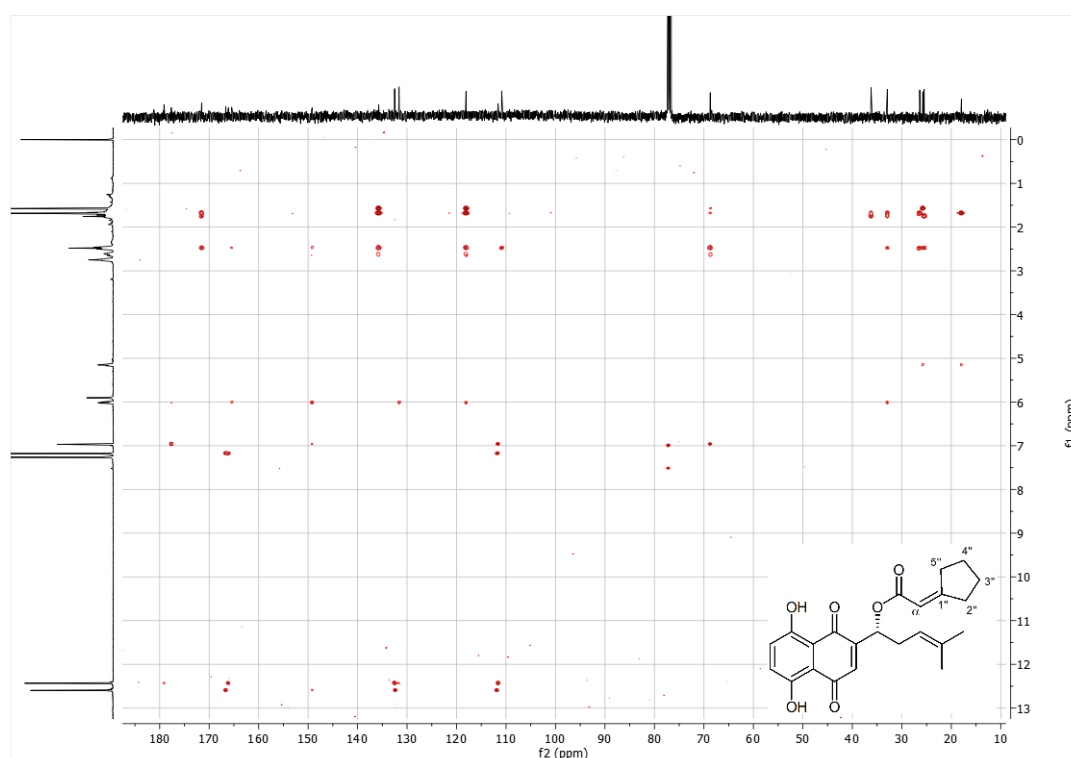

102  $^1\text{H-NMR}$  spectrum of (*R*)-1-(1,4-dihydro-5,8-dihydroxy-1,4-dioxonaphthalen-2-yl)-4-methylpent-3-  
 103 enyl 2-cyclohexylidenacetate (**4**):

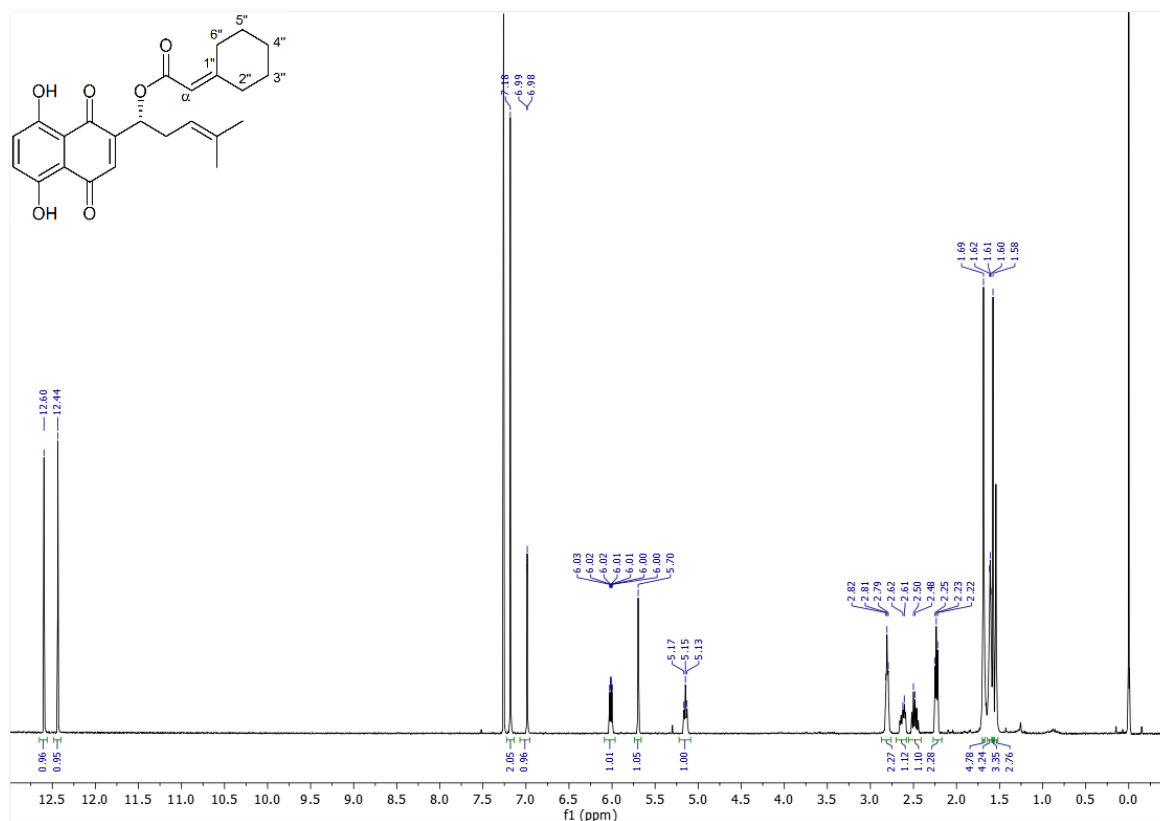

104

105  $^{13}\text{C-NMR}$  spectrum of (*R*)-1-(1,4-dihydro-5,8-dihydroxy-1,4-dioxonaphthalen-2-yl)-4-methylpent-3-  
 106 enyl 2-cyclohexylidenacetate (**4**):

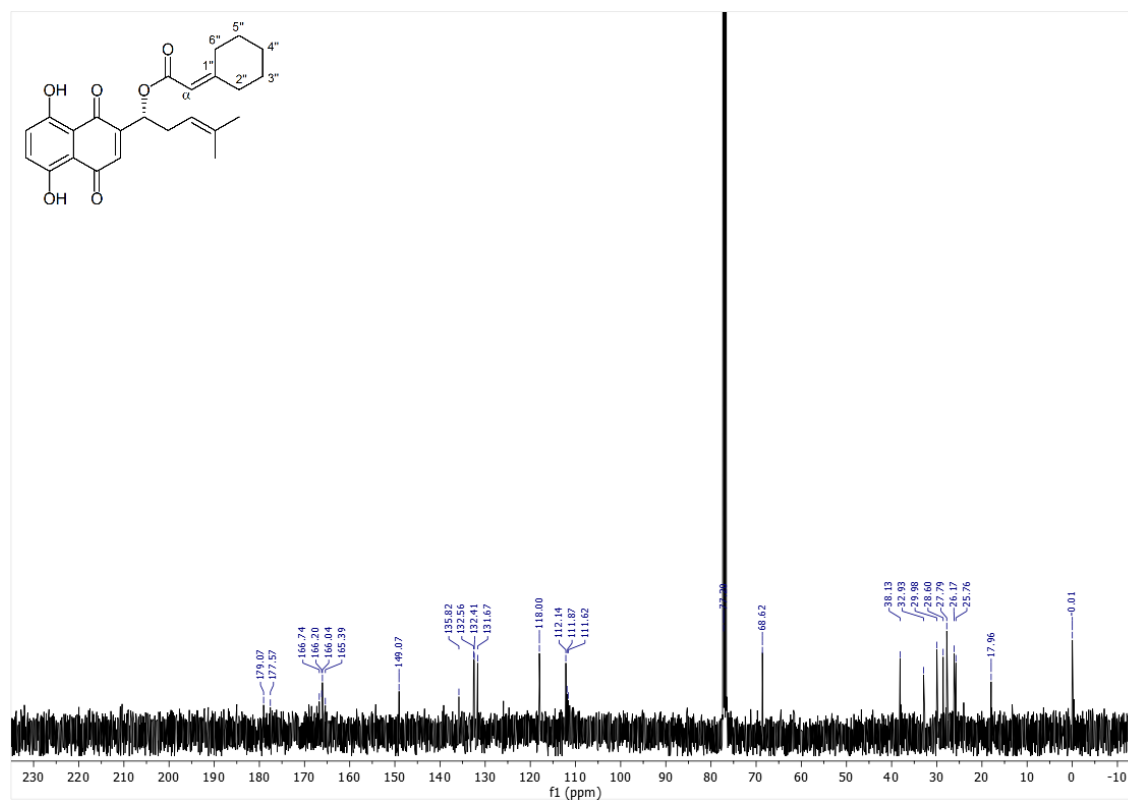

107

108 HMBC spectrum of (*R*)-1-(1,4-dihydro-5,8-dihydroxy-1,4-dioxonaphthalen-2-yl)-4-methylpent-3-enyl  
 109 2-cyclohexylidenacetate (4):

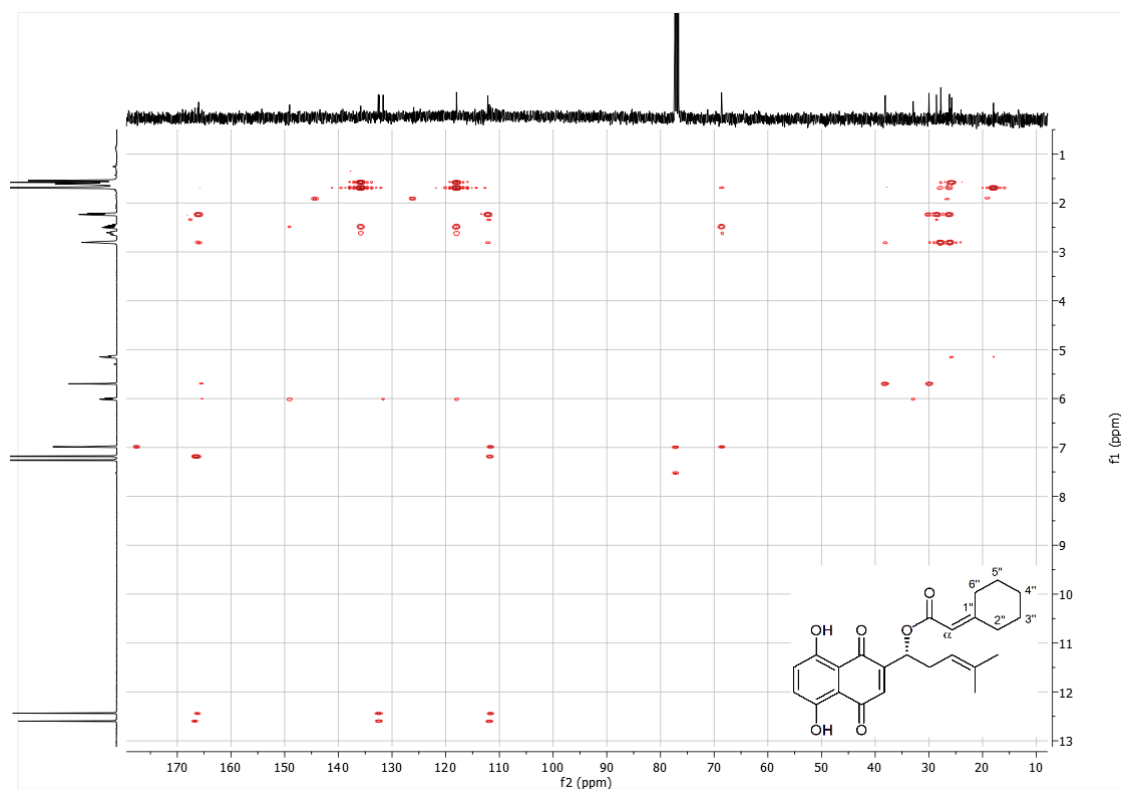

110

111 <sup>1</sup>H-NMR spectrum of (*R*)-1-(1,4-dihydro-5,8-dihydroxy-1,4-dioxonaphthalen-2-yl)-4-methylpent-3-  
 112 enyl 2-cycloheptylidenacetate (5):

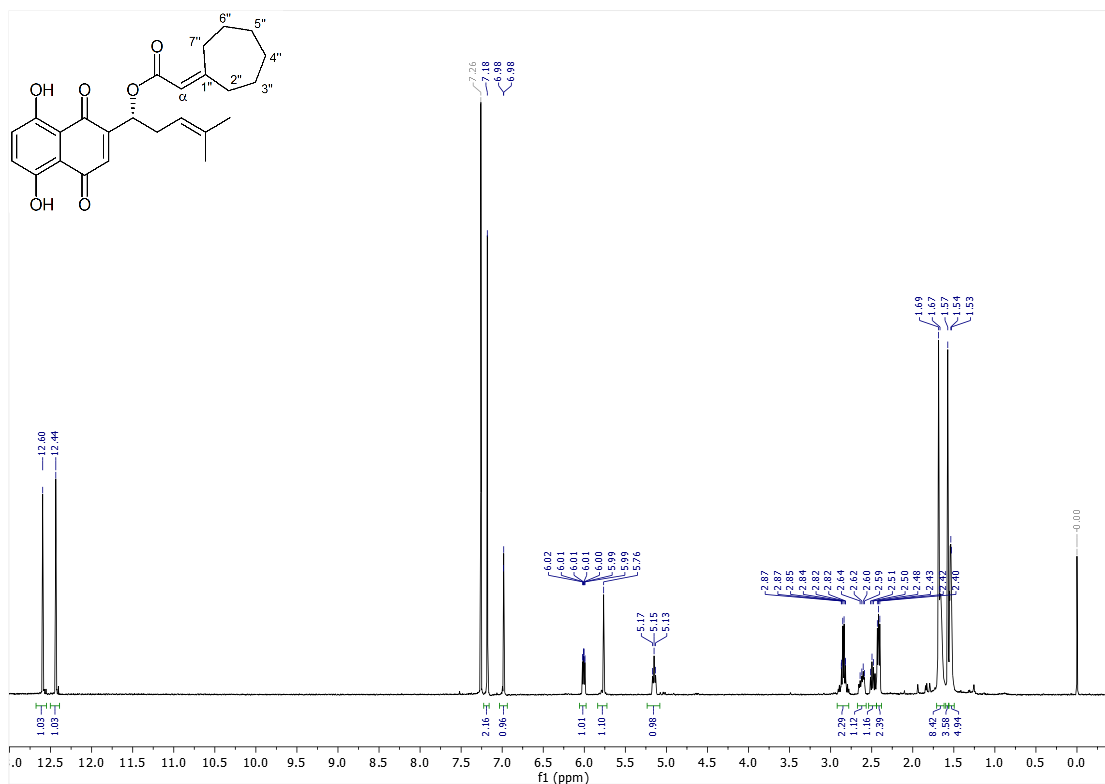

113



114  $^{13}\text{C}$ -NMR spectrum of (*R*)-1-(1,4-dihydro-5,8-dihydroxy-1,4-dioxonaphthalen-2-yl)-4-methylpent-3-  
 115 enyl 2-cycloheptylidenacetate (5):

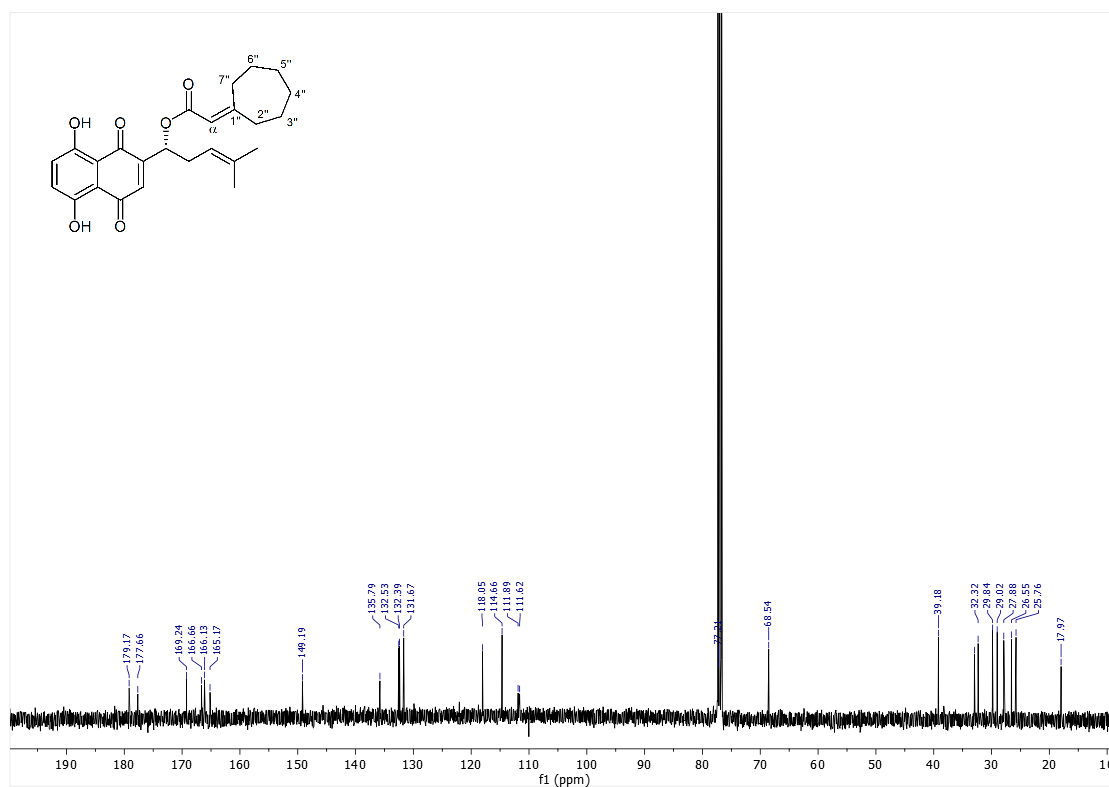

116

117  $^1\text{H}$ -NMR spectrum of (*R*)-1-(1,4-dihydro-5,8-dihydroxy-1,4-dioxonaphthalen-2-yl)-4-methylpent-3-  
 118 enyl cyclopropylacetate (6):

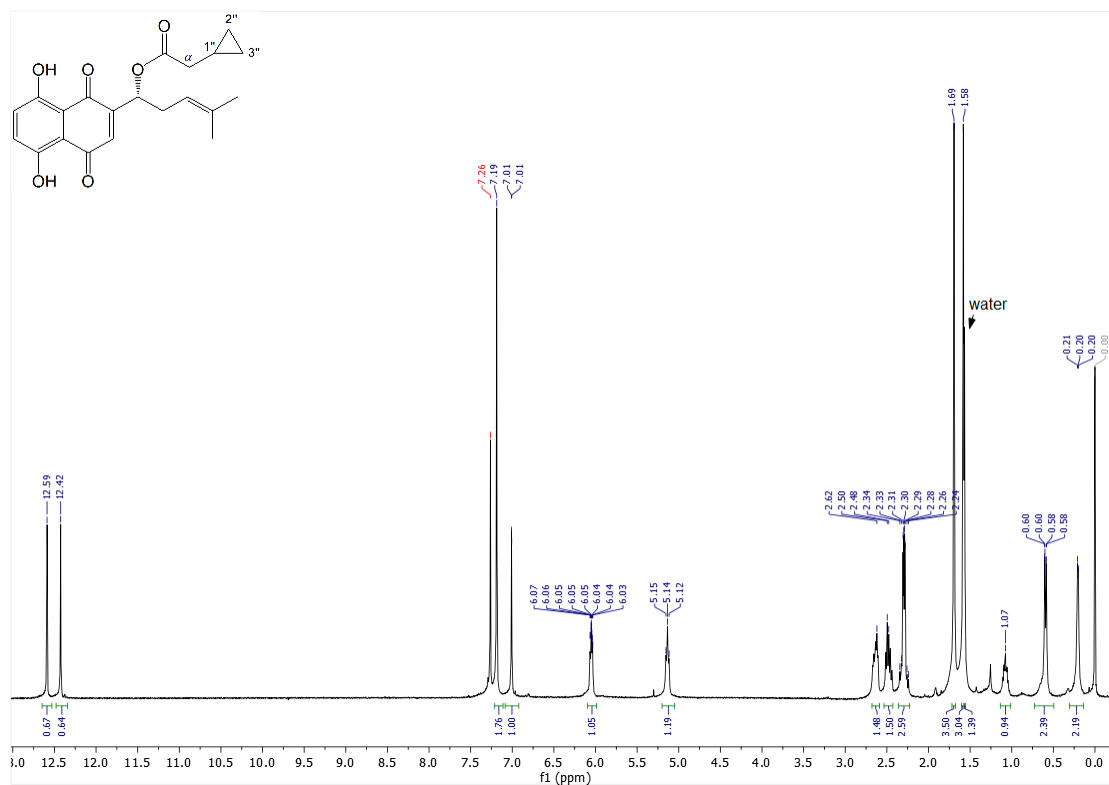

119

120  $^{13}\text{C}$ -NMR spectrum of (*R*)-1-(1,4-dihydro-5,8-dihydroxy-1,4-dioxonaphthalen-2-yl)-4-methylpent-3-  
 121 enyl cyclopropylacetate (6):

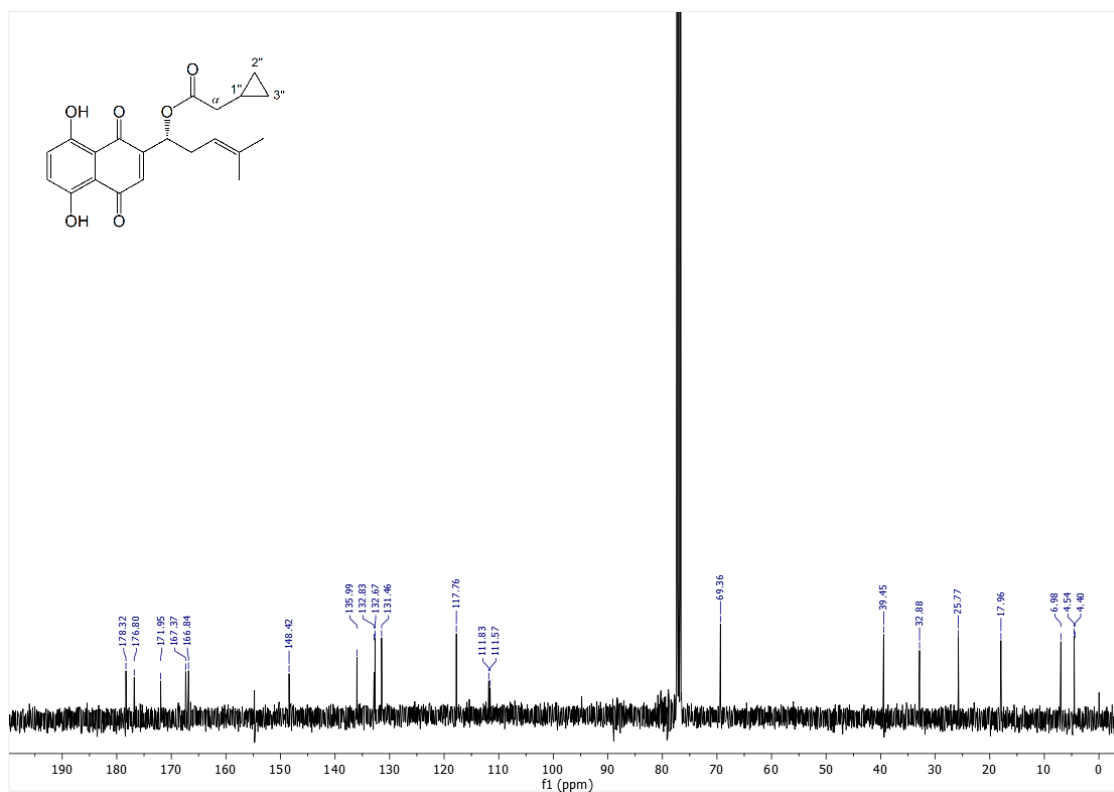

123  $^1\text{H}$ -NMR spectrum of (*R*)-1-(1,4-dihydro-5,8-dihydroxy-1,4-dioxonaphthalen-2-yl)-4-methylpent-3-  
 124 enyl cyclobutylacetate (7):

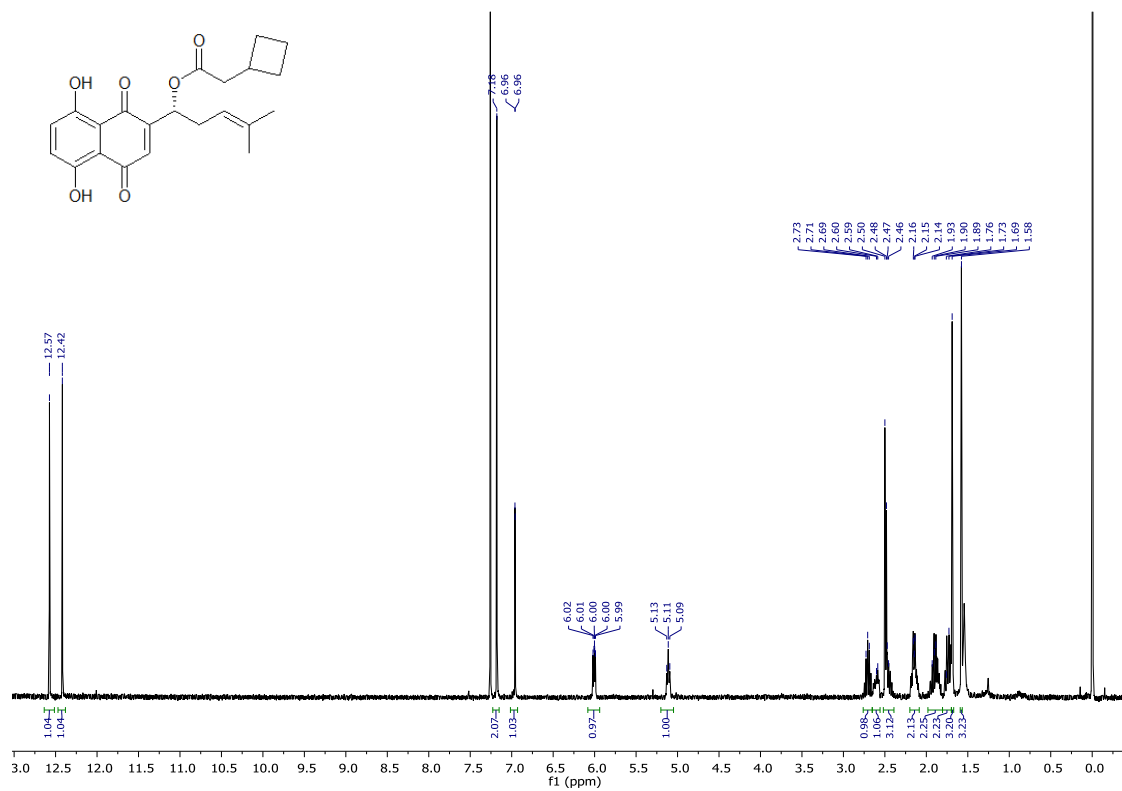

127  $^{13}\text{C}$ -NMR spectrum of (*R*)-1-(1,4-dihydro-5,8-dihydroxy-1,4-dioxonaphthalen-2-yl)-4-methylpent-3-  
 128 enyl cyclobutylacetate (7):

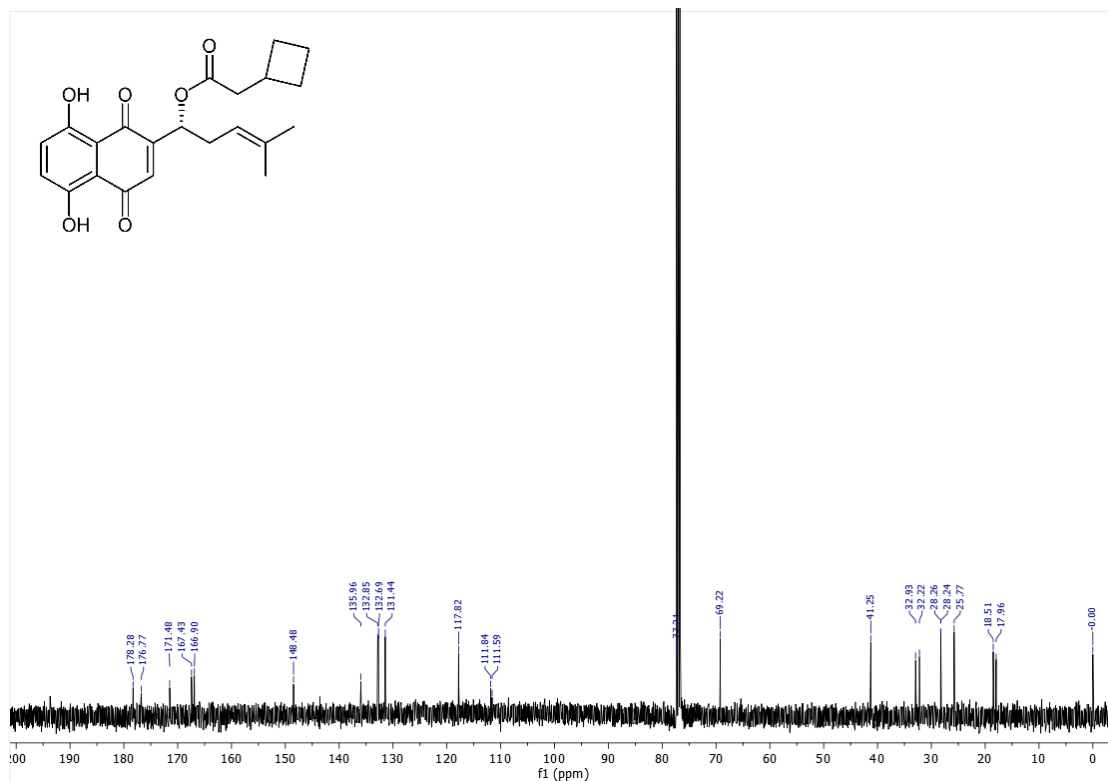

129

130  $^1\text{H}$ -NMR spectrum of (*R*)-1-(1,4-dihydro-5,8-dihydroxy-1,4-dioxonaphthalen-2-yl)-4-methylpent-3-  
 131 enyl cyclopentylacetate (8):

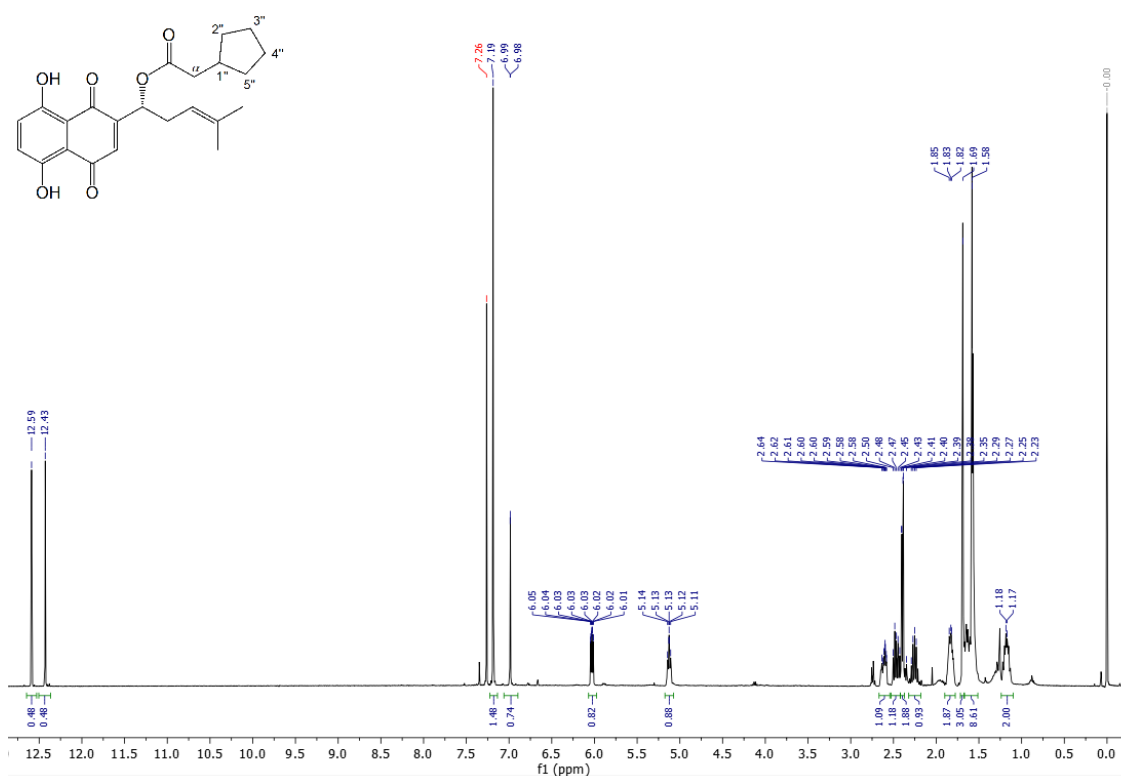

132

133  $^1\text{H-NMR}$  spectrum of (*R*)-1-(1,4-dihydro-5,8-dihydroxy-1,4-dioxonaphthalen-2-yl)-4-methylpent-3-  
 134 enyl cyclopentylacetate (**8**):

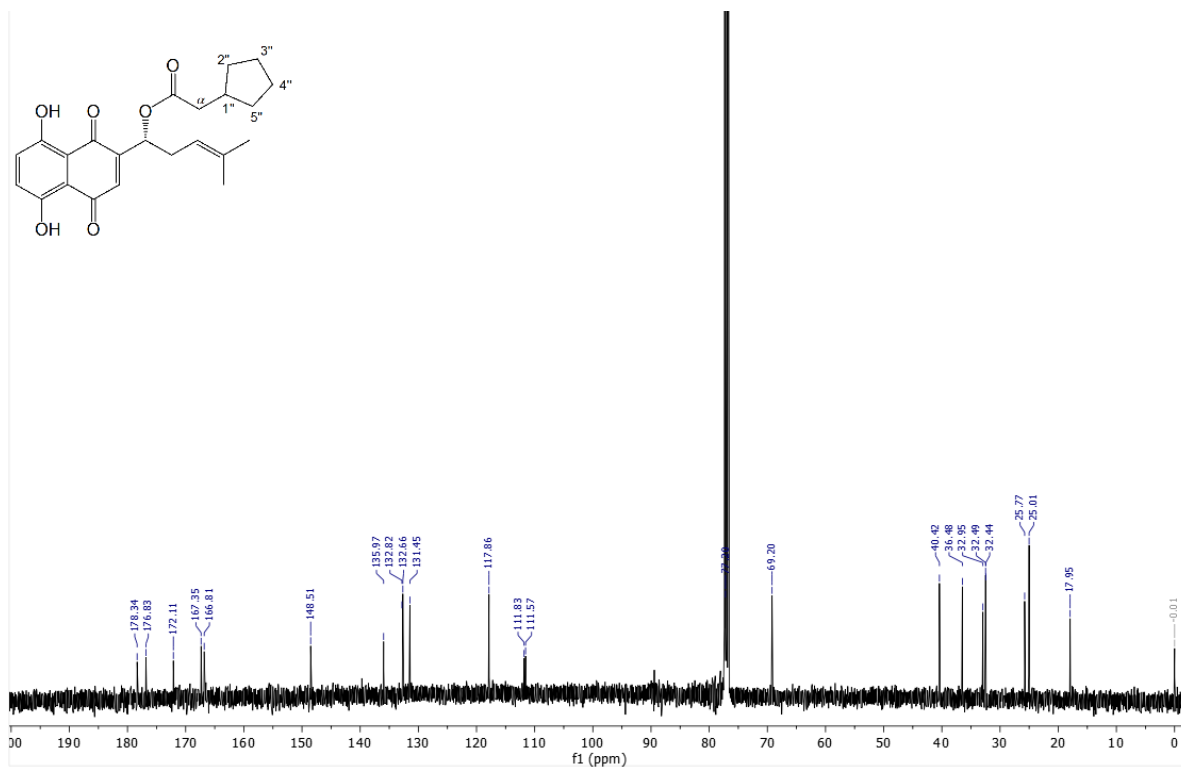

136  $^1\text{H-NMR}$  spectrum of (*R*)-1-(1,4-dihydro-5,8-dihydroxy-1,4-dioxonaphthalen-2-yl)-4-methylpent-3-  
 137 enyl cyclohexylacetate (**9**):

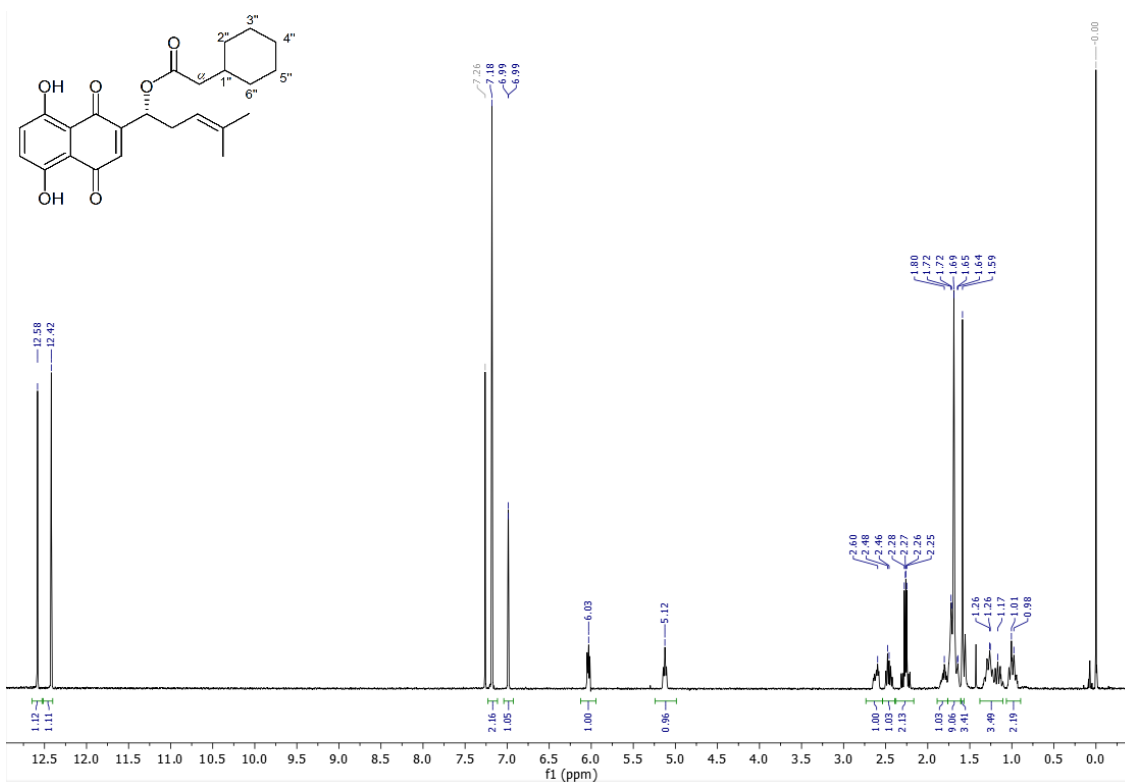

139  $^{13}\text{C}$ -NMR spectrum of (*R*)-1-(1,4-dihydro-5,8-dihydroxy-1,4-dioxonaphthalen-2-yl)-4-methylpent-3-  
 140 enyl cyclohexylacetate (**9**):

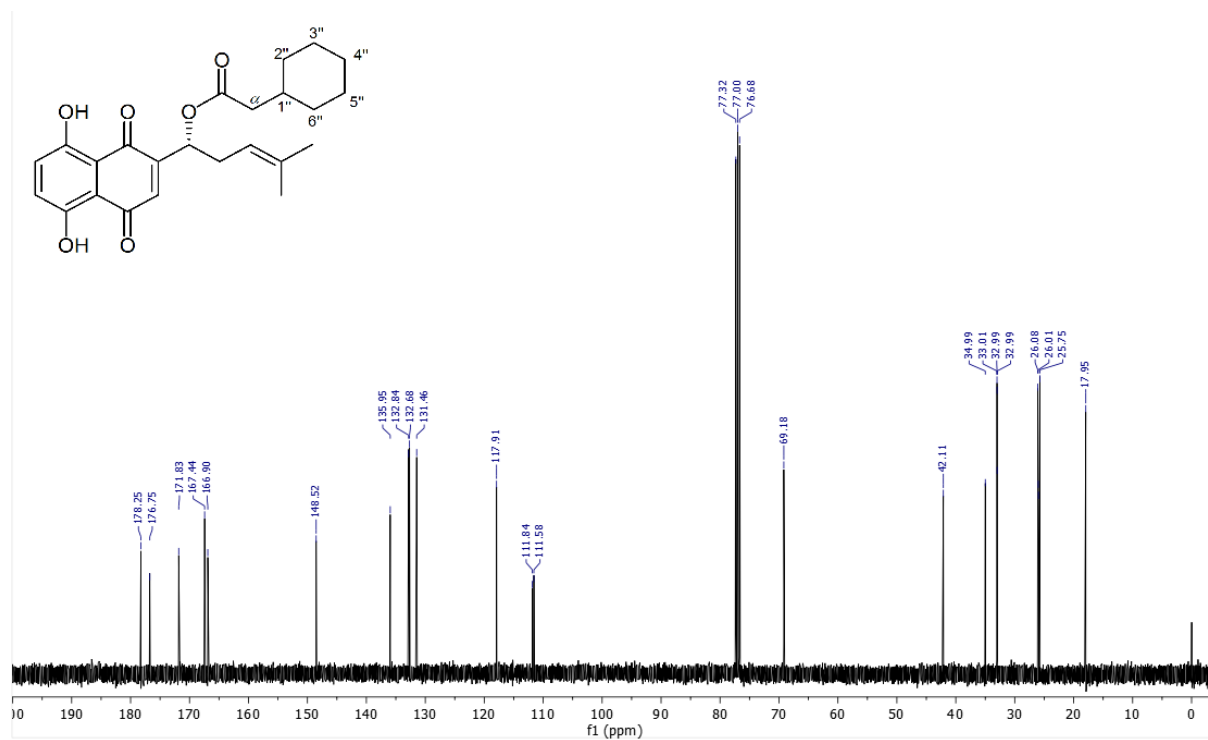

142  $^1\text{H}$ -NMR spectrum of (*R*)-1-(1,4-dihydro-5,8-dihydroxy-1,4-dioxonaphthalen-2-yl)-4-methylpent-3-  
 143 enyl 1-cyclohexen-1-ylacetate (**10**):

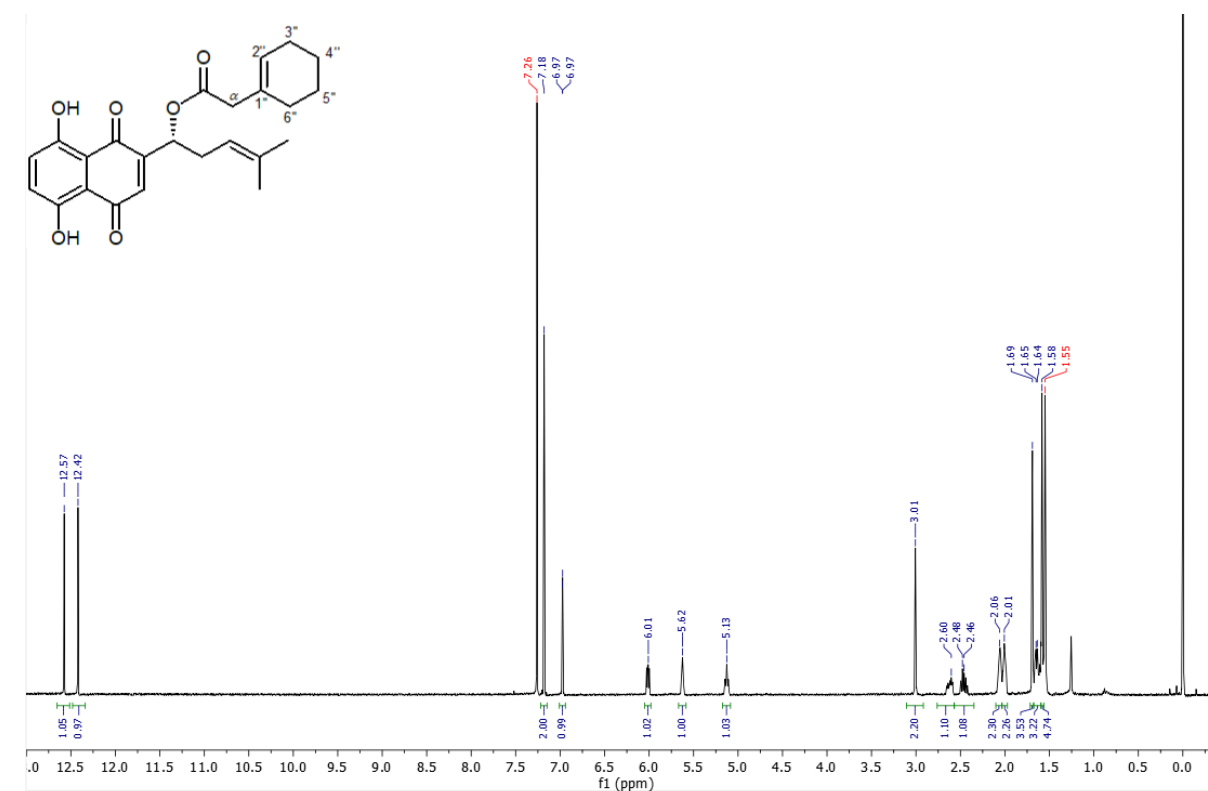

145  $^{13}\text{C}$ -NMR spectrum of (*R*)-1-(1,4-dihydro-5,8-dihydroxy-1,4-dioxonaphthalen-2-yl)-4-methylpent-3-  
 146 enyl 1-cyclohexen-1-ylacetate (**10**):

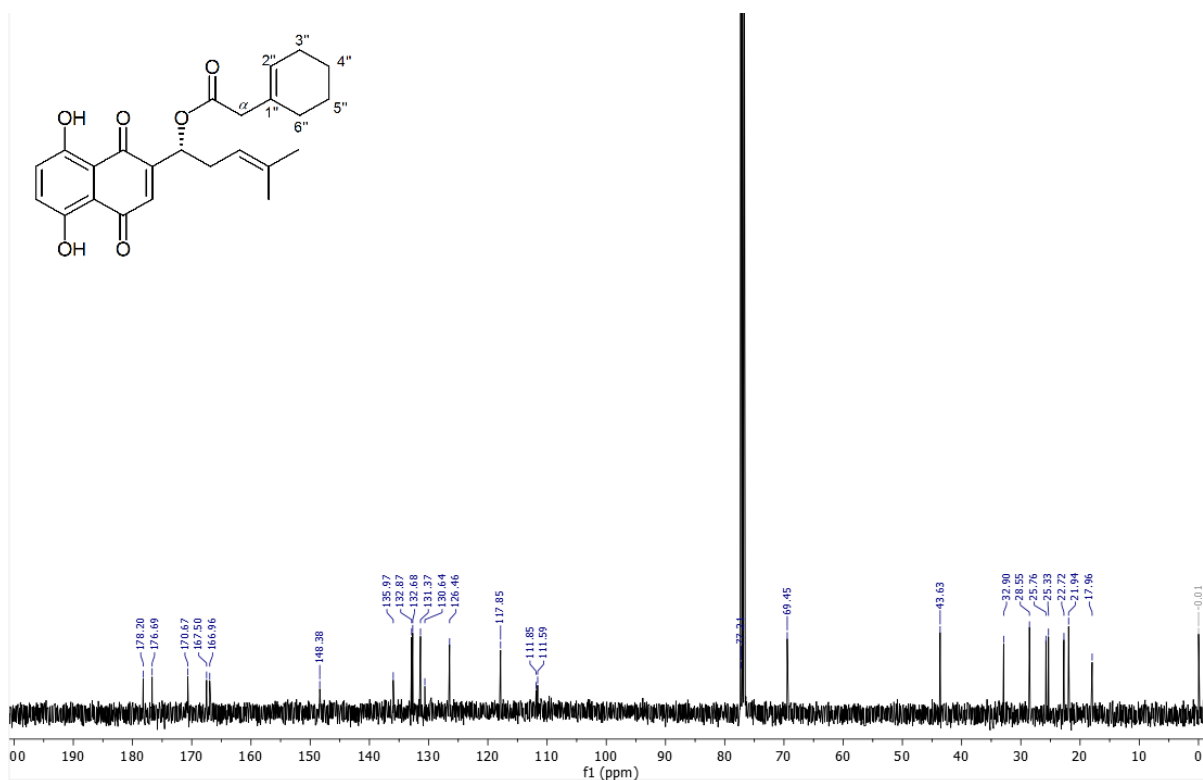

148  $^1\text{H}$ -NMR spectrum of (*R*)-1-(1,4-dihydro-5,8-dihydroxy-1,4-dioxonaphthalen-2-yl)-4-methylpent-3-  
 149 enyl cyclobutanecarboxylate (**12**):

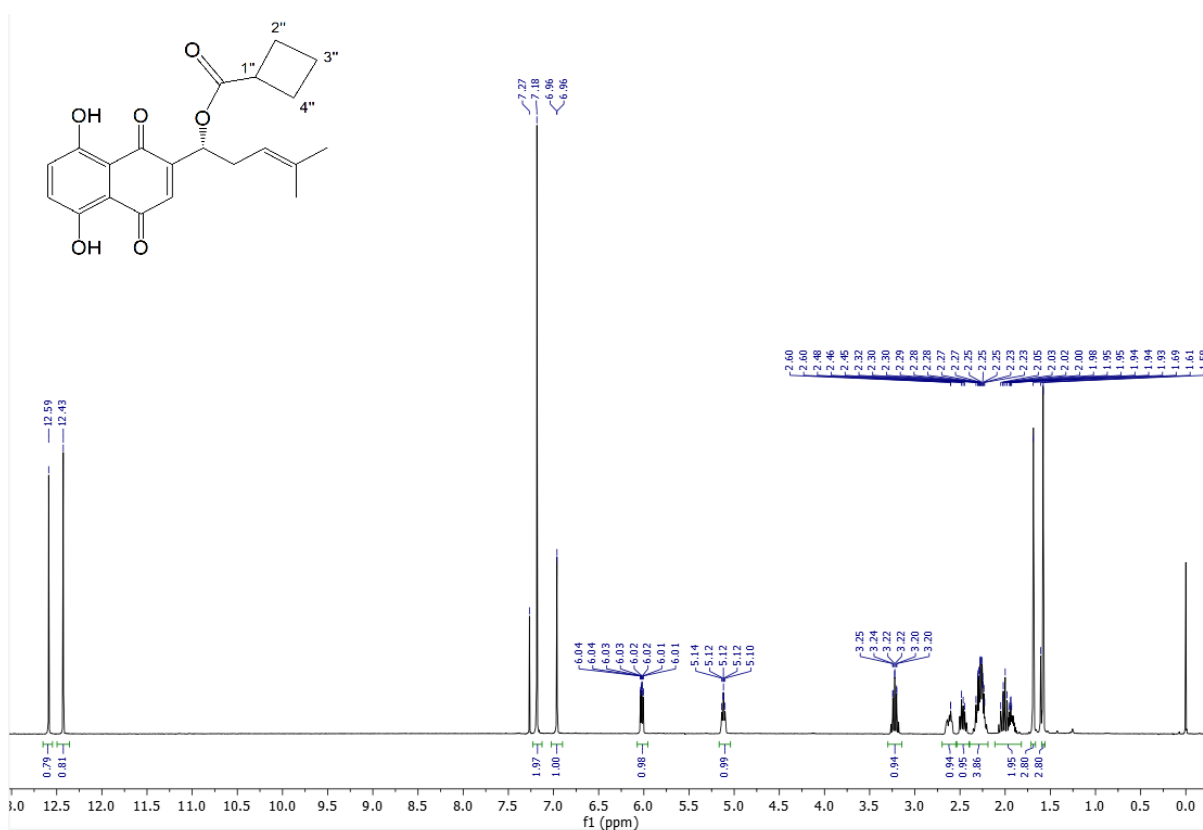

151  $^{13}\text{C}$ -NMR spectrum of (*R*)-1-(1,4-dihydro-5,8-dihydroxy-1,4-dioxonaphthalen-2-yl)-4-methylpent-3-  
 152 enyl cyclobutanecarboxylate (**12**):

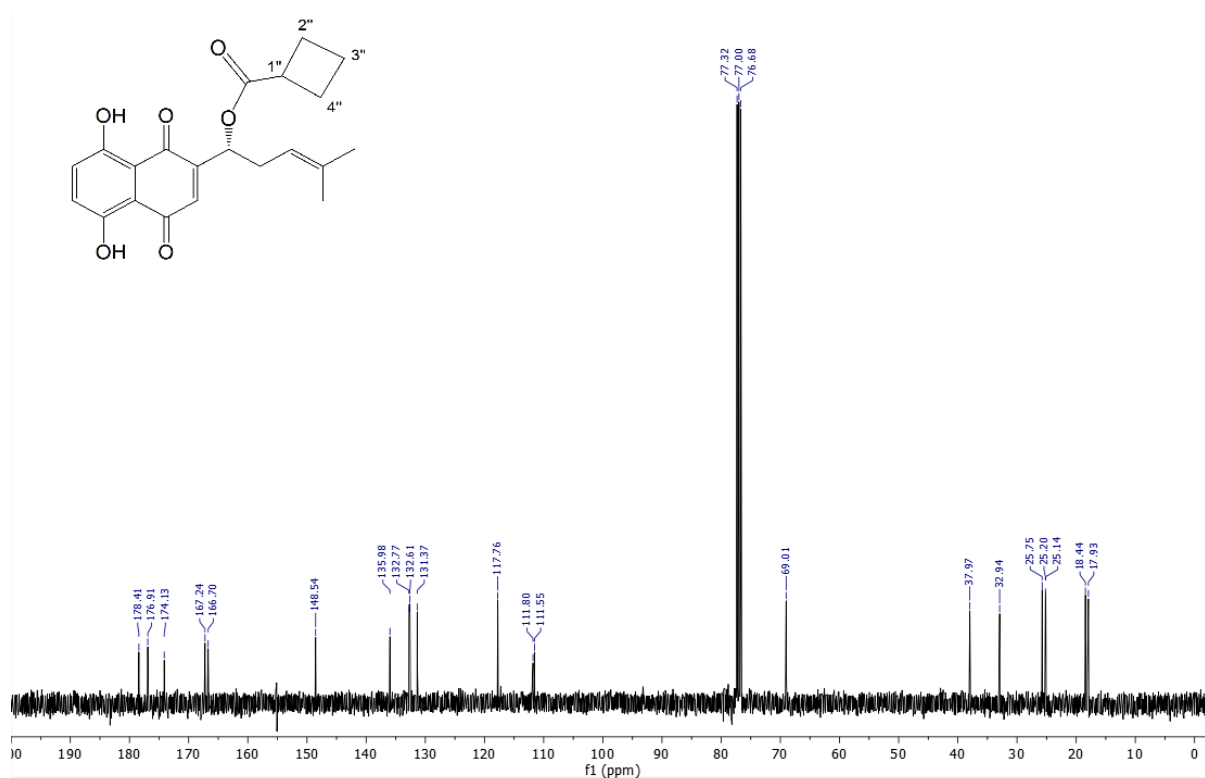

153

154  $^1\text{H}$ -NMR spectrum of (*R*)-1-(1,4-dihydro-5,8-dihydroxy-1,4-dioxonaphthalen-2-yl)-4-methylpent-3-  
 155 enyl cyclopentanecarboxylate (**13**):

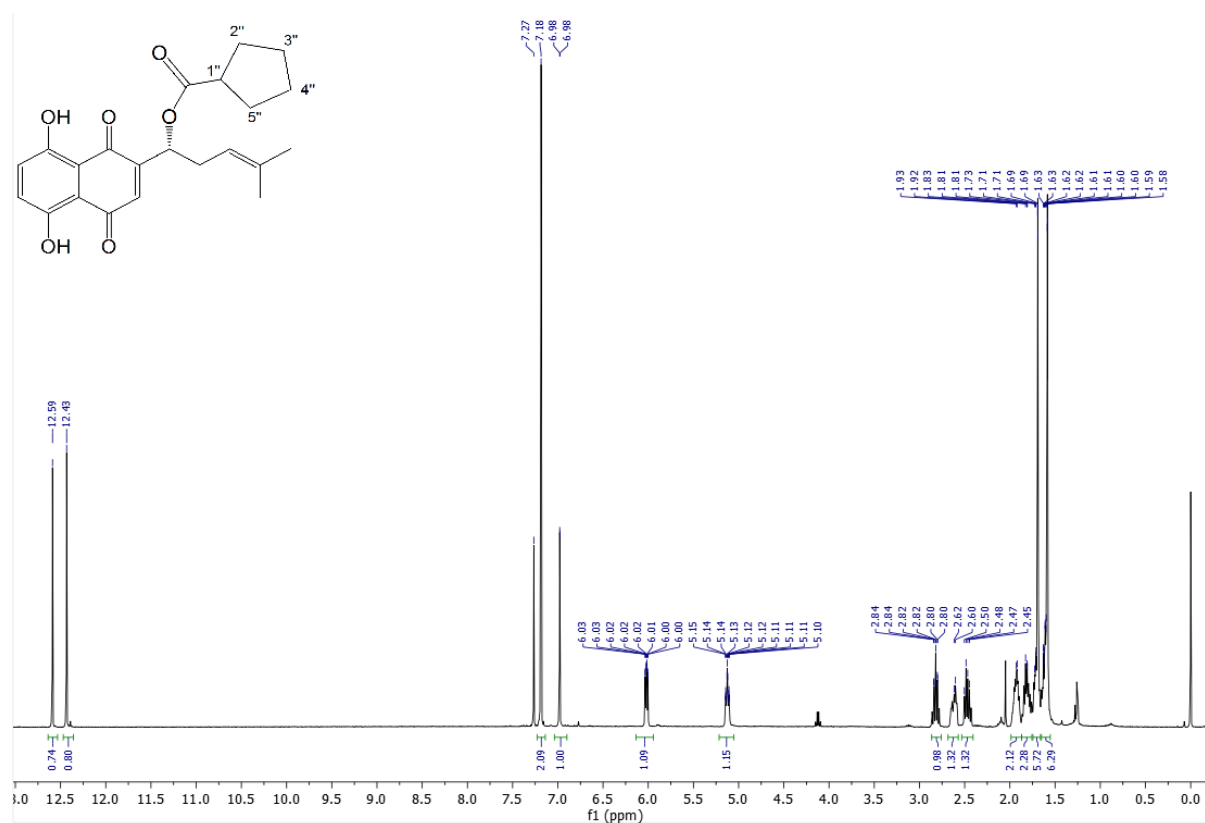

156

157  $^{13}\text{C}$ -NMR spectrum of (*R*)-1-(1,4-dihydro-5,8-dihydroxy-1,4-dioxonaphthalen-2-yl)-4-methylpent-3-  
 158 enyl cyclopentanecarboxylate (**13**):

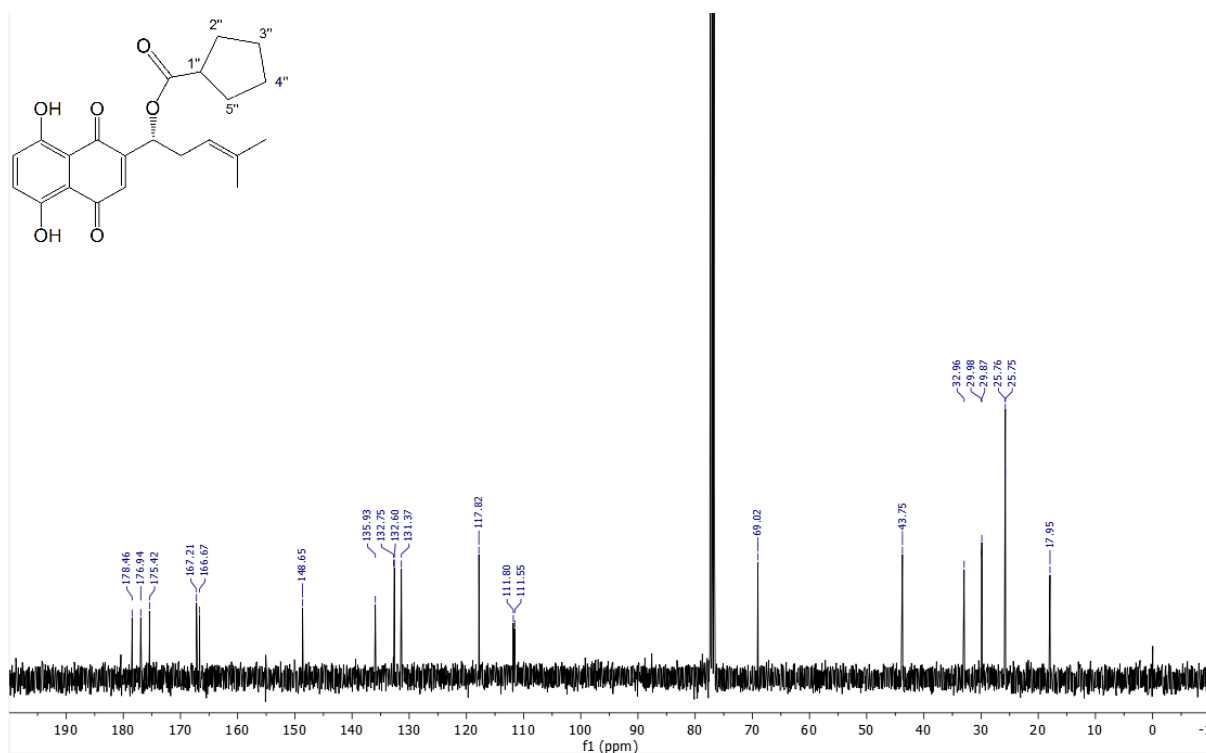

160  $^1\text{H}$ -NMR spectrum of (*R*)-1-(1,4-dihydro-5,8-dihydroxy-1,4-dioxonaphthalen-2-yl)-4-methylpent-3-  
 161 enyl cyclohexanecarboxylate (**14**):

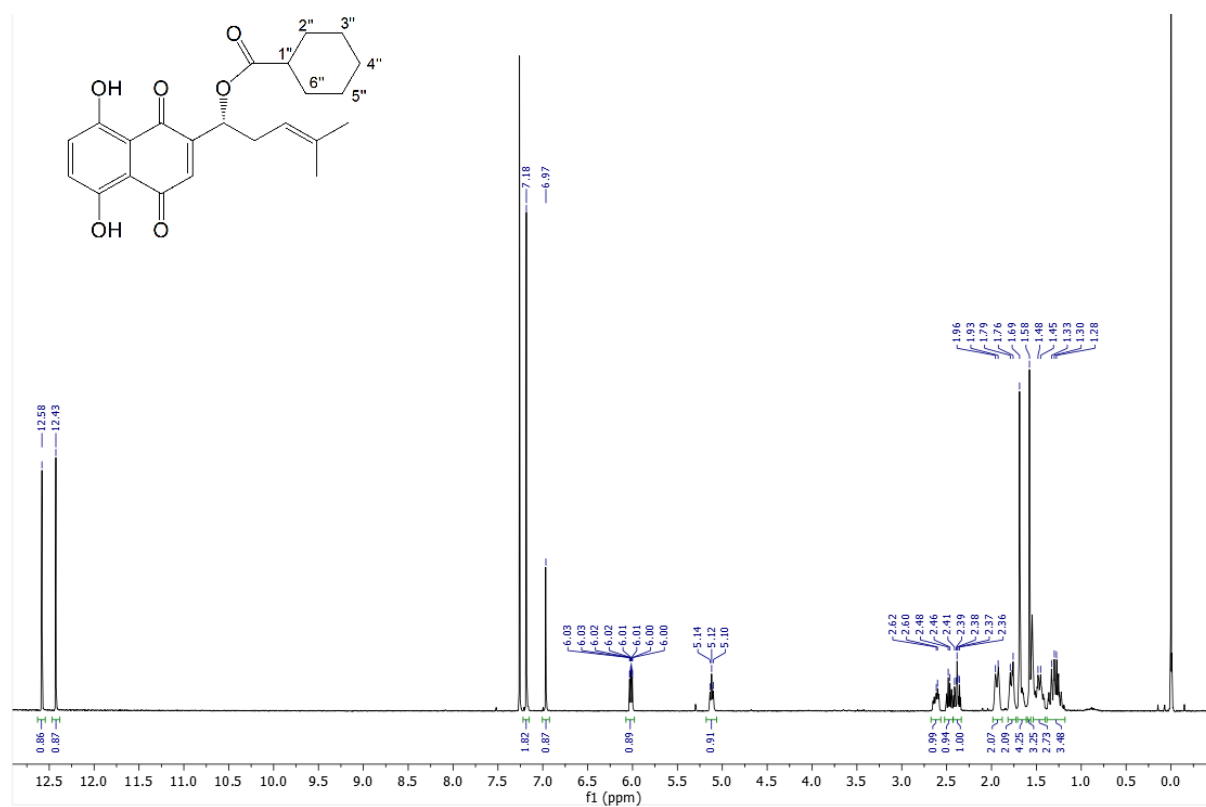



163  $^{13}\text{C}$ -NMR spectrum of (*R*)-1-(1,4-dihydro-5,8-dihydroxy-1,4-dioxonaphthalen-2-yl)-4-methylpent-3-  
 164 enyl cyclohexanecarboxylate (**14**):

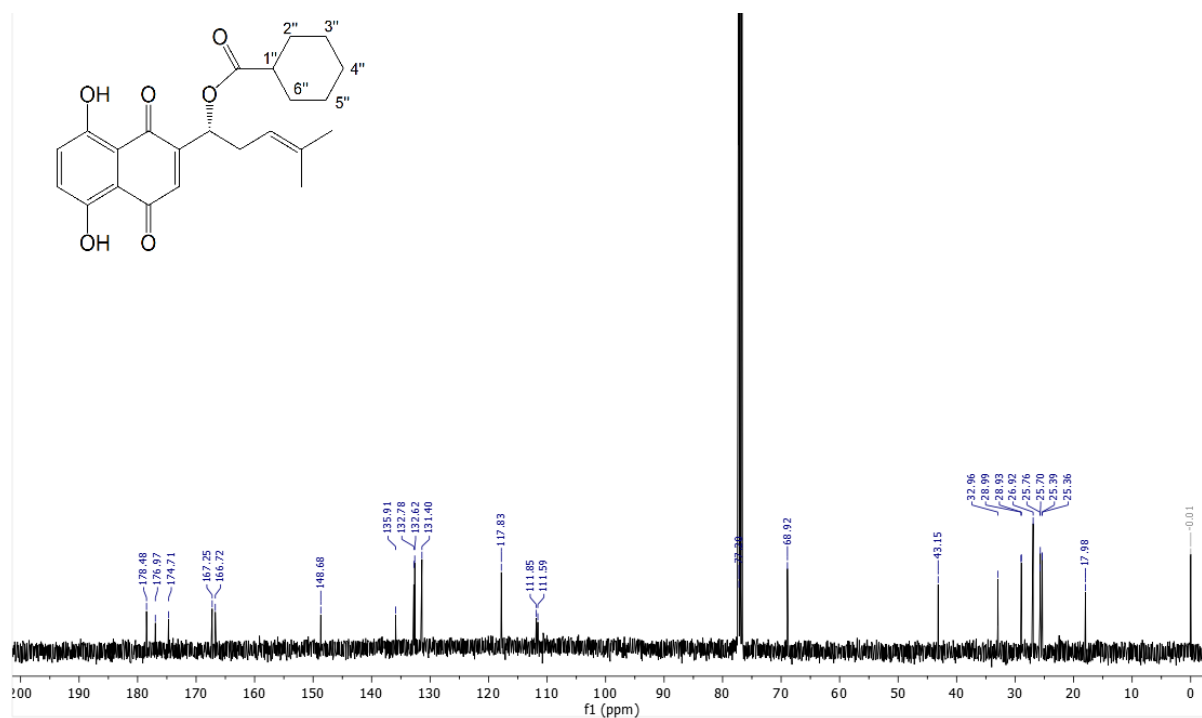

166  $^1\text{H}$ -NMR spectrum of (*R*)-1-(1,4-dihydro-5,8-dihydroxy-1,4-dioxonaphthalen-2-yl)-4-methylpent-3-  
 167 enyl cyclohex-1-enecarboxylate (**15**):

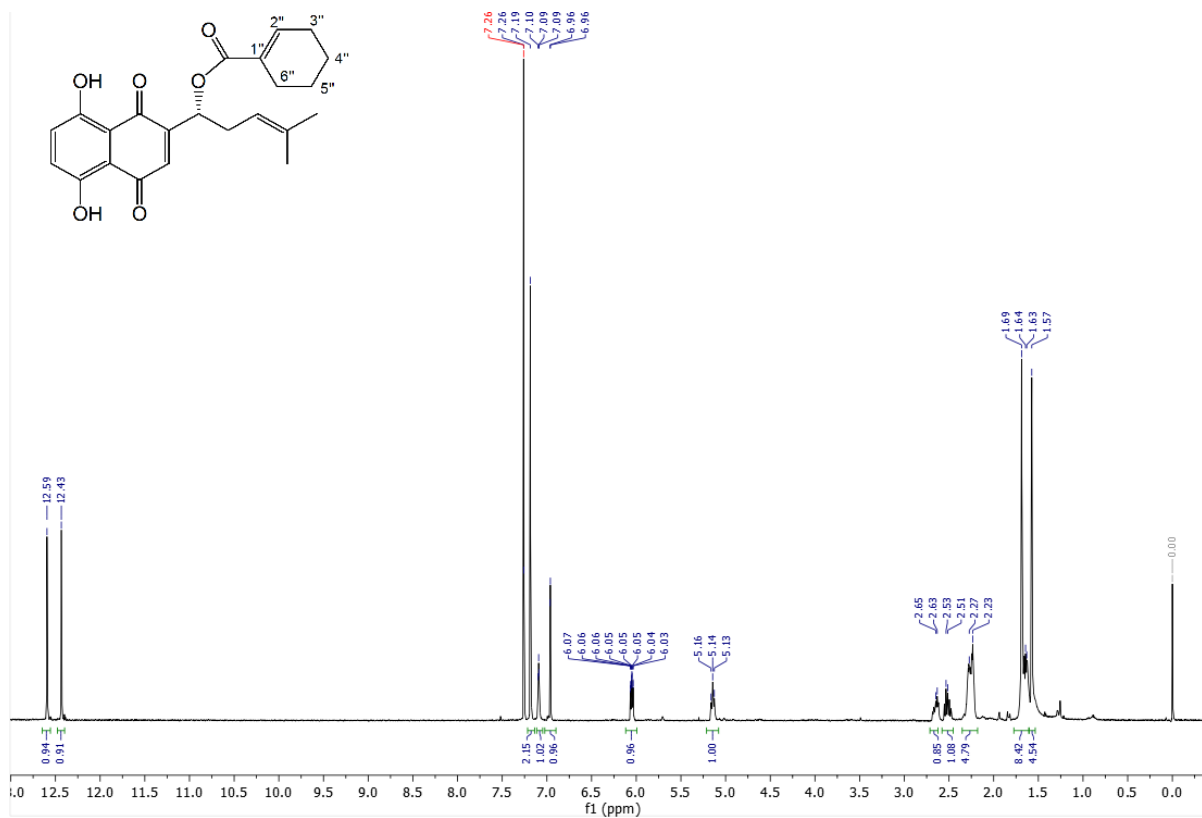

169  $^{13}\text{C}$ -NMR spectrum of (*R*)-1-(1,4-dihydro-5,8-dihydroxy-1,4-dioxonaphthalen-2-yl)-4-methylpent-3-  
 170 enyl cyclohex-1-enecarboxylate (**15**):

171

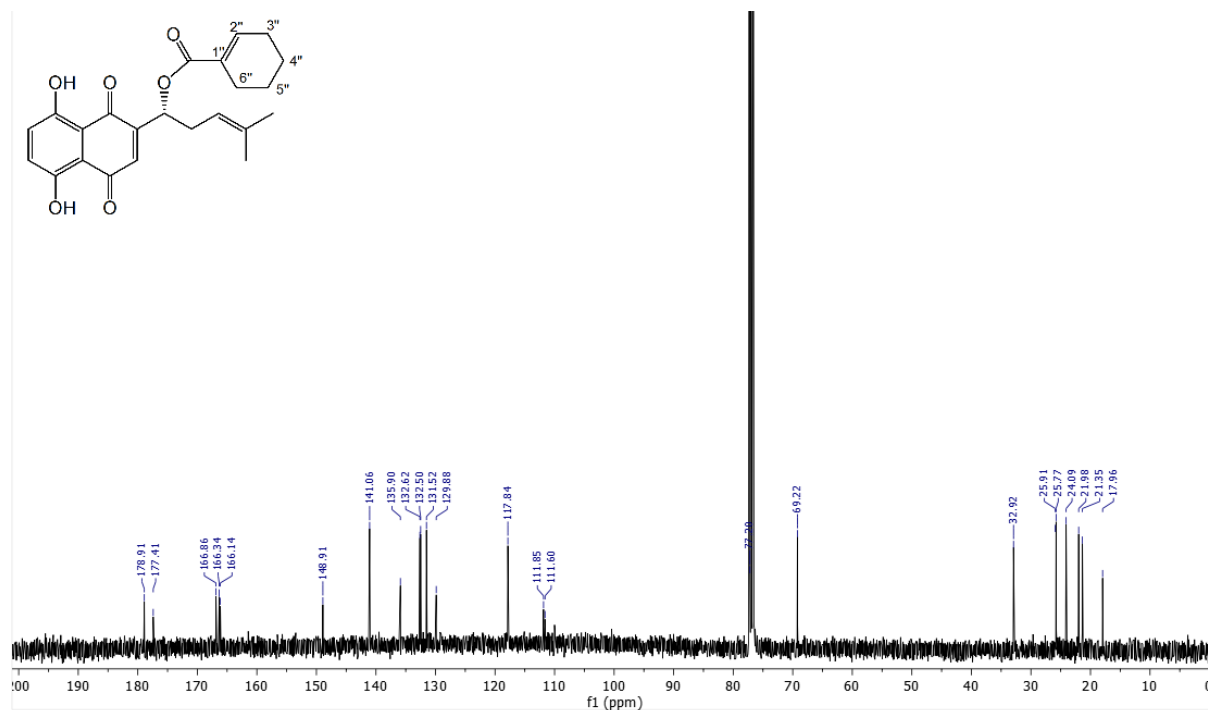

173  $^1\text{H}$ -NMR spectrum of (*R*)-1-(1,4-dihydro-5,8-dihydroxy-1,4-dioxonaphthalen-2-yl)-4-methylpent-3-  
 174 enyl cyclohex-3-enecarboxylate (**16**):

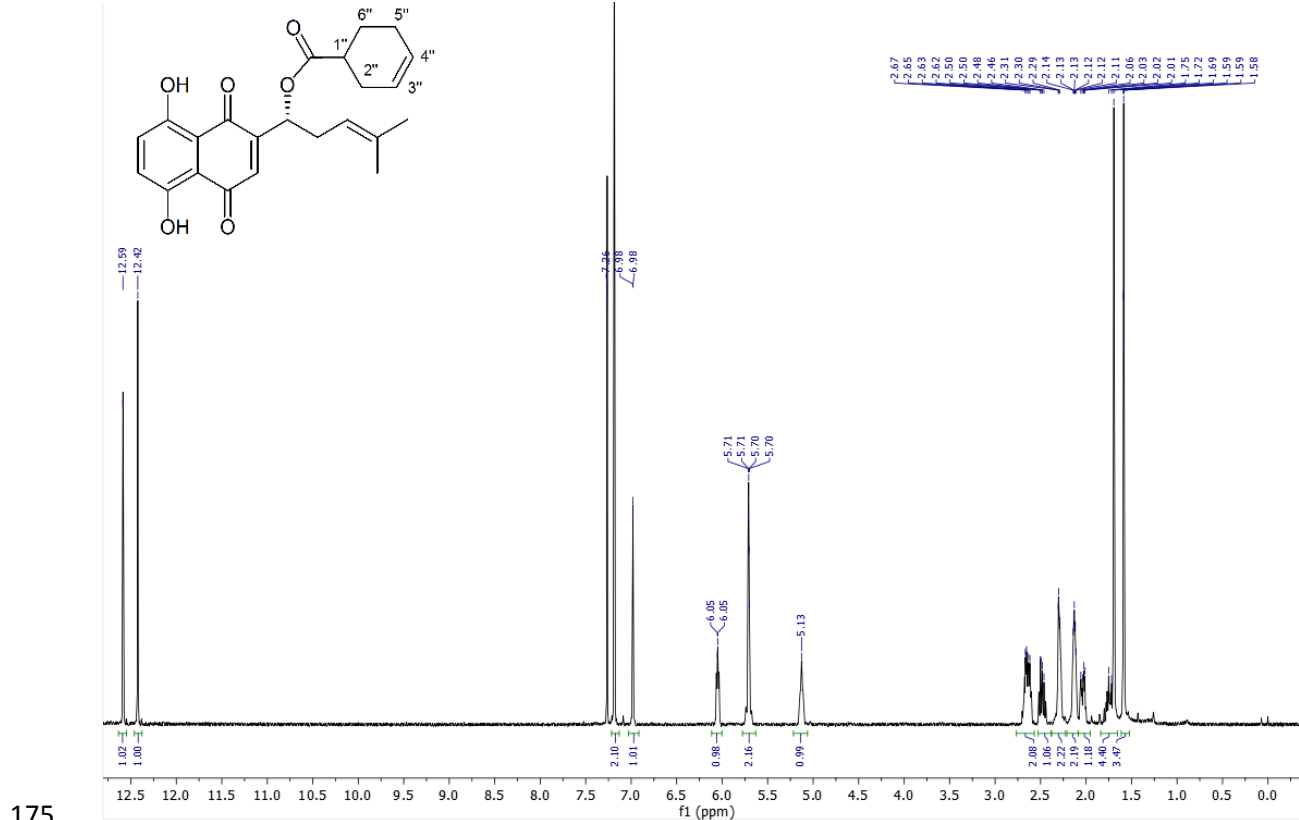

176  $^{13}\text{C}$ -NMR spectrum of (*R*)-1-(1,4-dihydro-5,8-dihydroxy-1,4-dioxonaphthalen-2-yl)-4-methylpent-3-  
 177 enyl cyclohex-3-enecarboxylate (**16**):

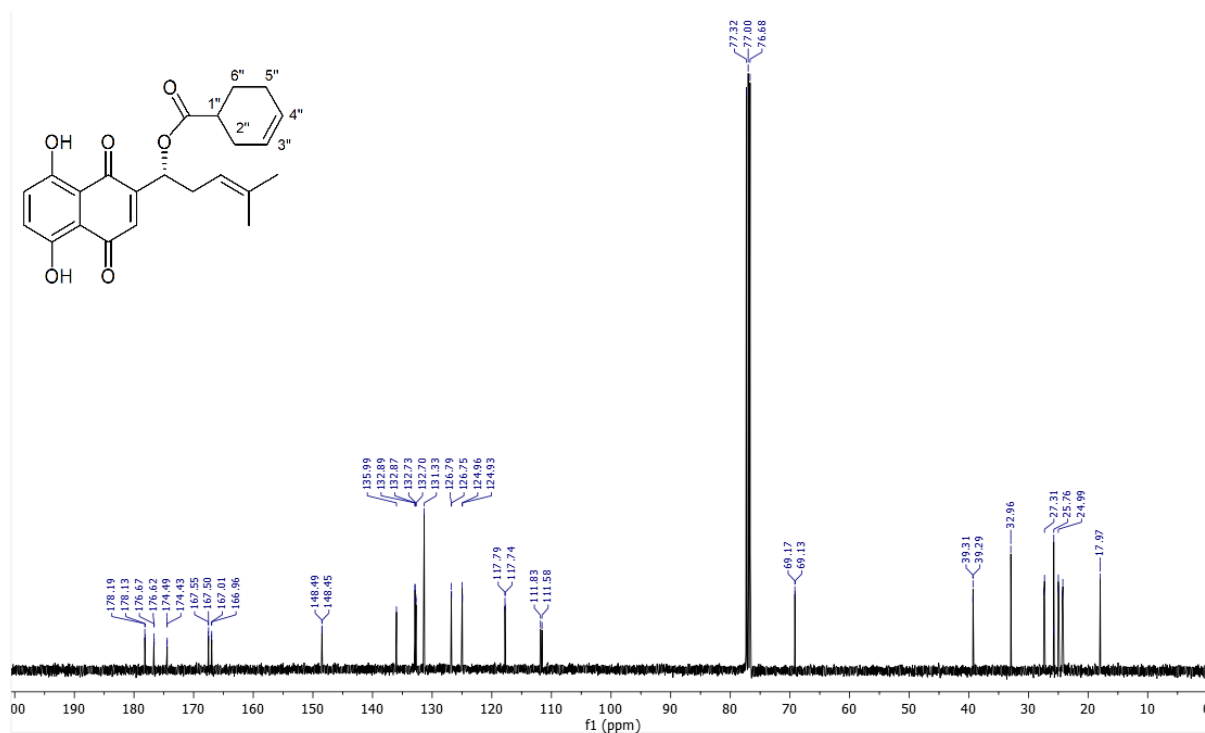

178

179  $^1\text{H}$ -NMR spectrum of (*R*)-1-(1,4-dihydro-5,8-dihydroxy-1,4-dioxonaphthalen-2-yl)-4-methylpent-3-  
 180 enyl trans 2-methylcyclopropanecarboxylate (**17**):

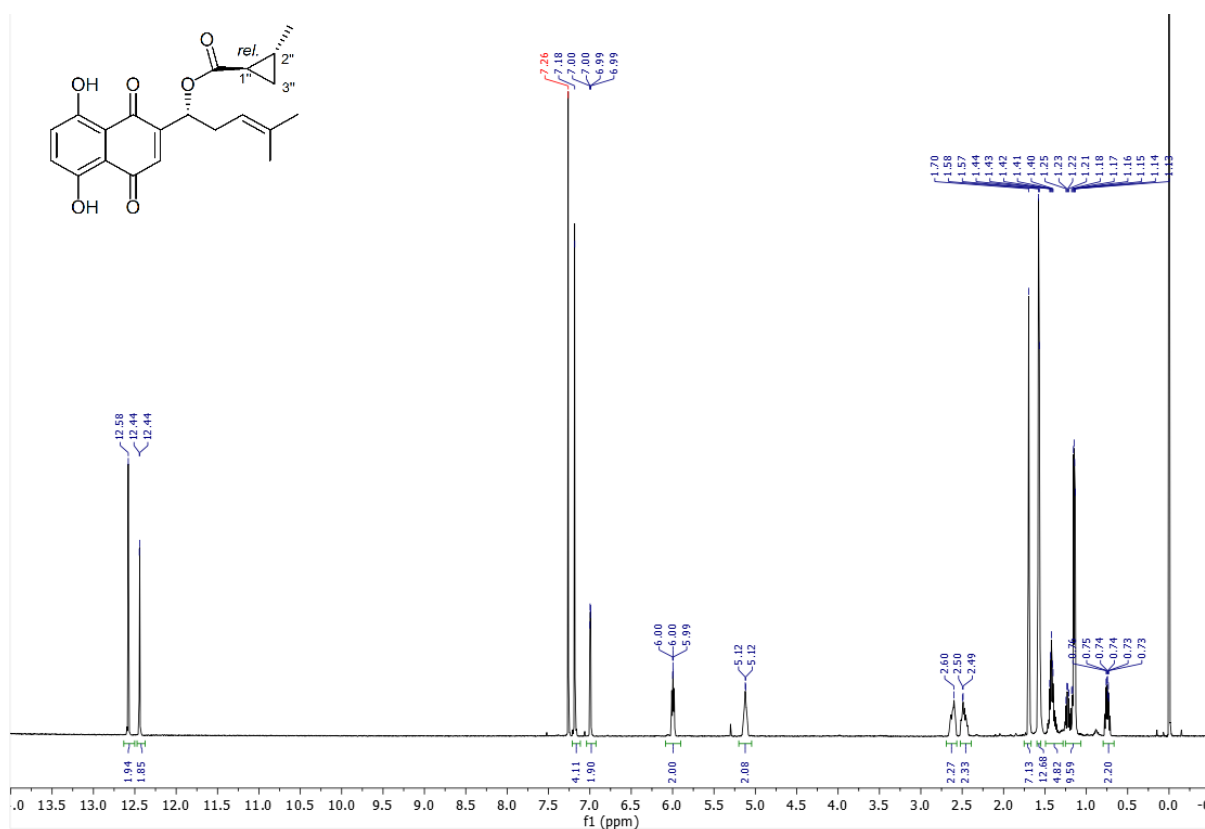

181

182  $^{13}\text{C}$ -NMR spectrum of (*R*)-1-(1,4-dihydro-5,8-dihydroxy-1,4-dioxonaphthalen-2-yl)-4-methylpent-3-  
 183 enyl cyclohex-3-enecarboxylate (17):

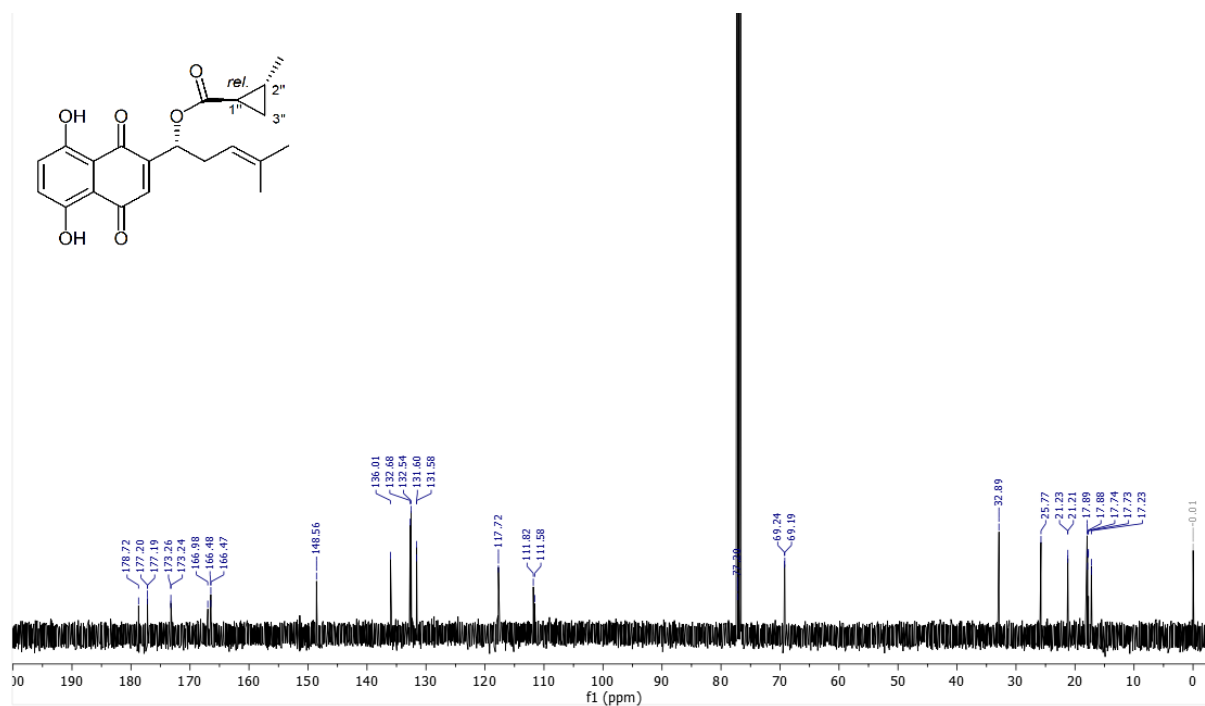

184

185  $^1\text{H}$ -NMR spectrum of Exo-(*R*)-1-(1,4-dihydro-5,8-dihydroxy-1,4-dioxonaphthalen-3-yl)-4-methylpent-  
 186 3-enyl bicyclo[2.2.1]hept-5-ene-2-carboxylate (18):

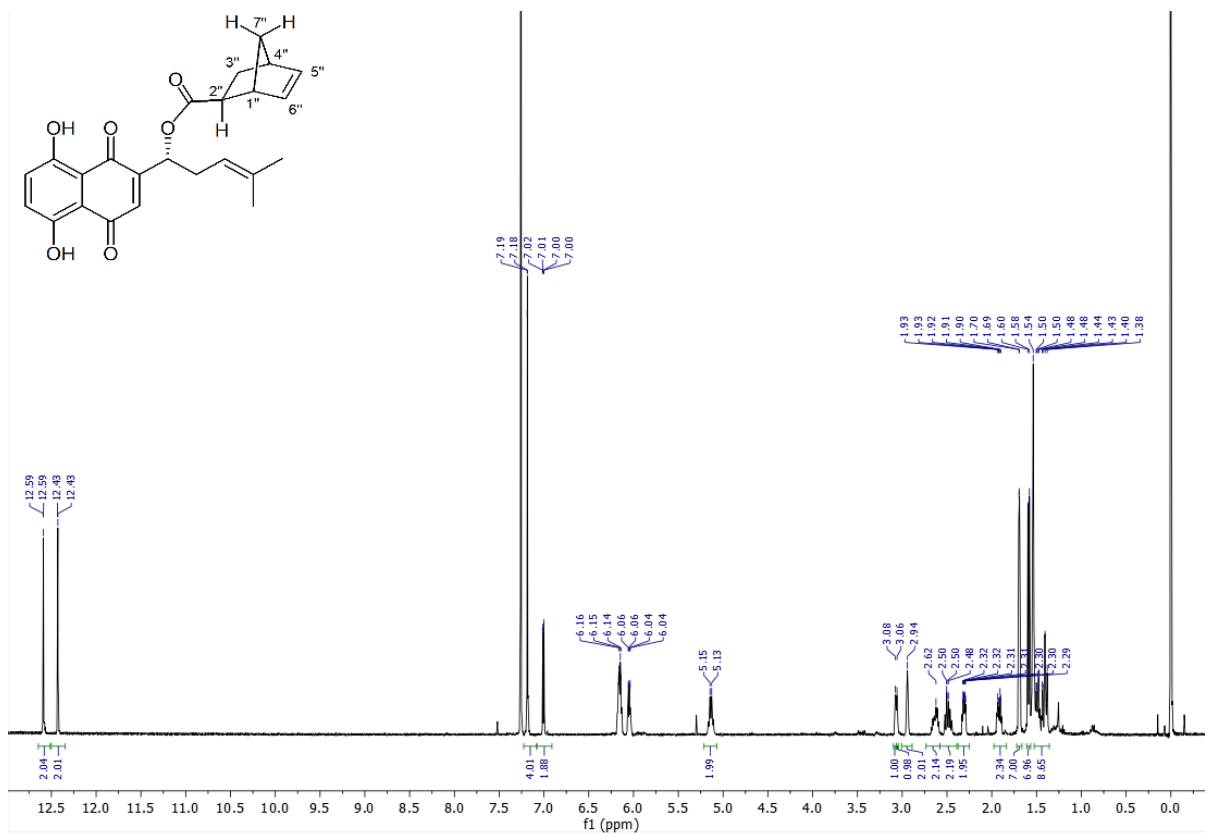

187

188 <sup>13</sup>C-NMR spectrum of Exo-(R)-1-(1,4-dihydro-5,8-dihydroxy-1,4-dioxonaphthalen-2-yl)-4-methylpent-  
 189 3-enyl cyclohex-3-enecarboxylate (**18**):

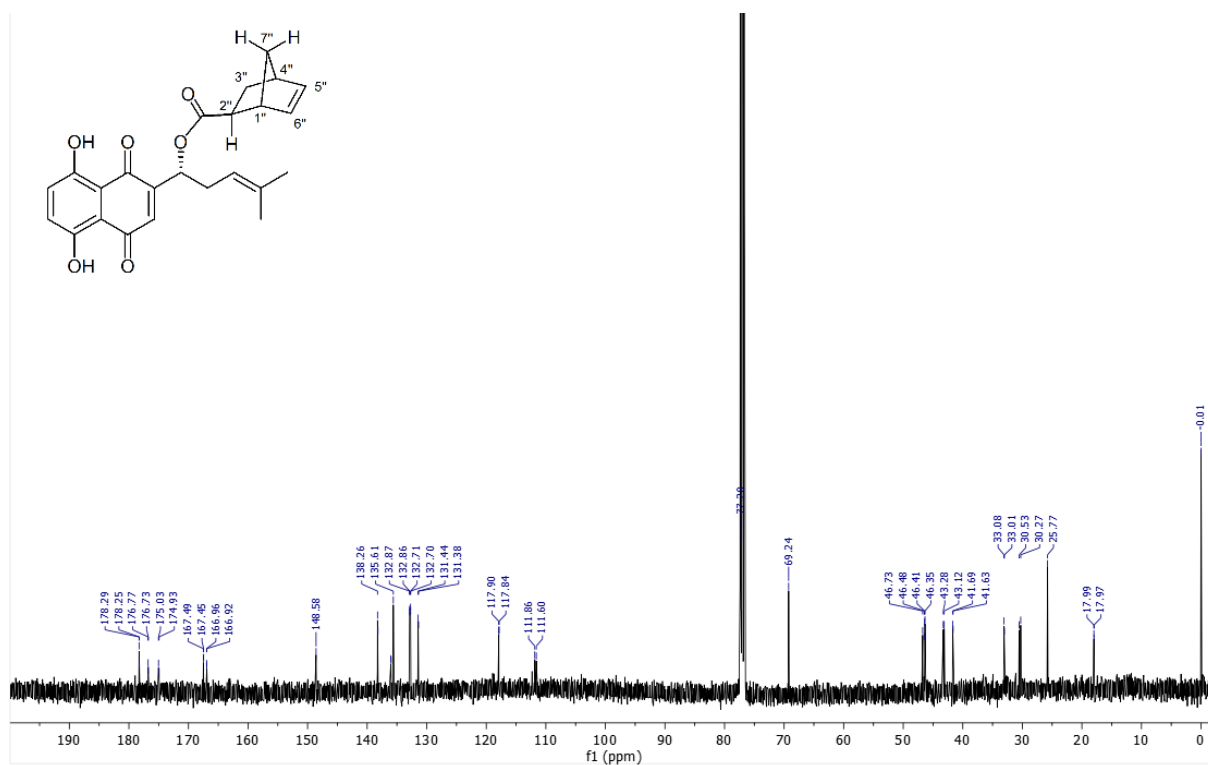

190

191 <sup>1</sup>H-NMR spectrum of Endo-(R)-1-(1,4-dihydro-5,8-dihydroxy-1,4-dioxonaphthalen-3-yl)-4-  
 192 methylpent-3-enyl bicyclo[2.2.1]hept-5-ene-2-carboxylate (**19**):

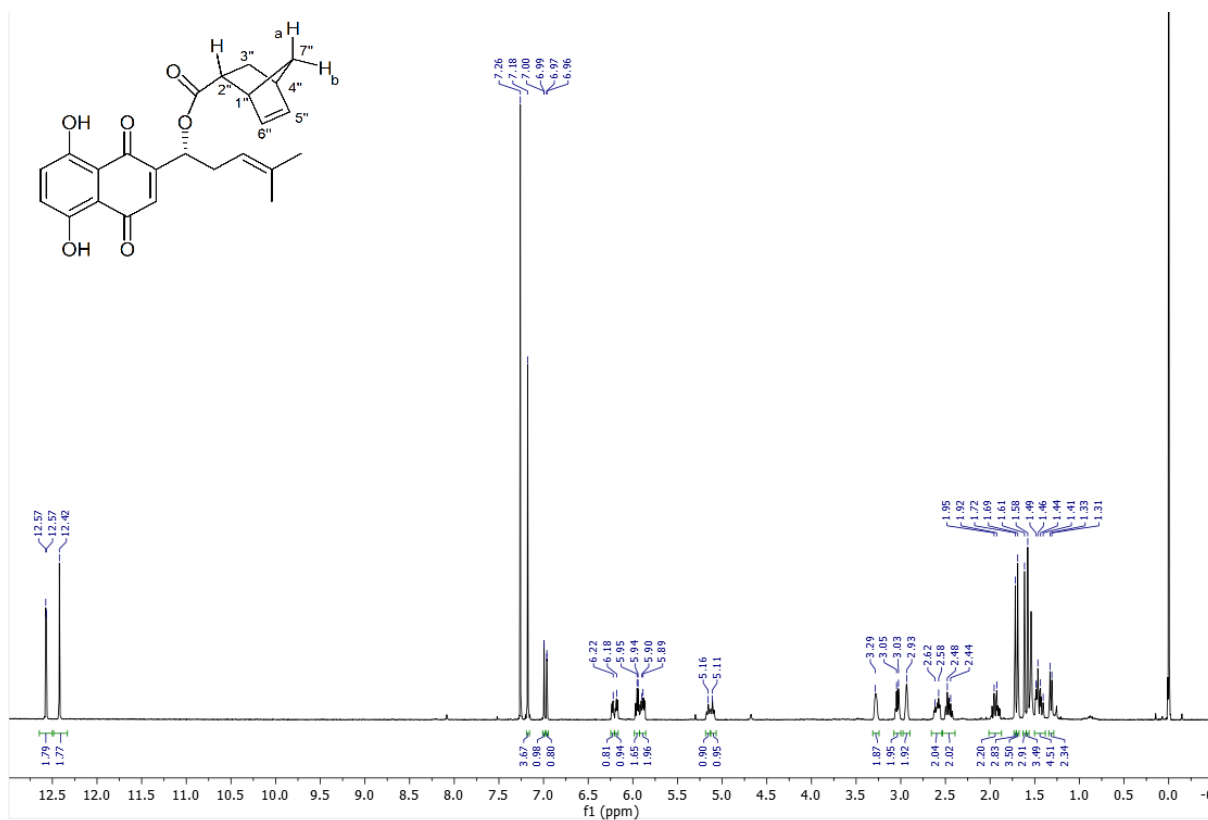

193

194  $^{13}\text{C}$ -NMR spectrum of Endo-(*R*)-1-(1,4-dihydro-5,8-dihydroxy-1,4-dioxonaphthalen-2-yl)-4-  
 195 methylpent-3-enyl cyclohex-3-enecarboxylate (**19**):

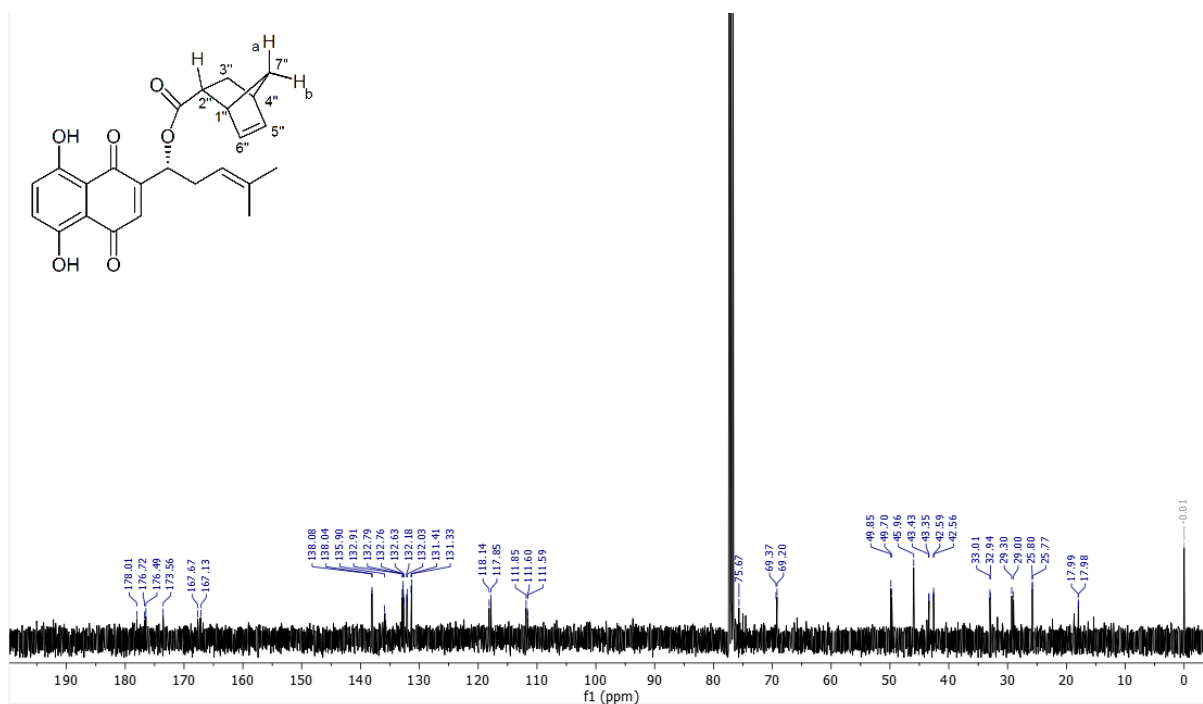

196

197 HMBC spectrum of Endo-(*R*)-1-(1,4-dihydro-5,8-dihydroxy-1,4-dioxonaphthalen-2-yl)-4-methylpent-  
 198 3-enyl cyclohex-3-enecarboxylate (**19**):

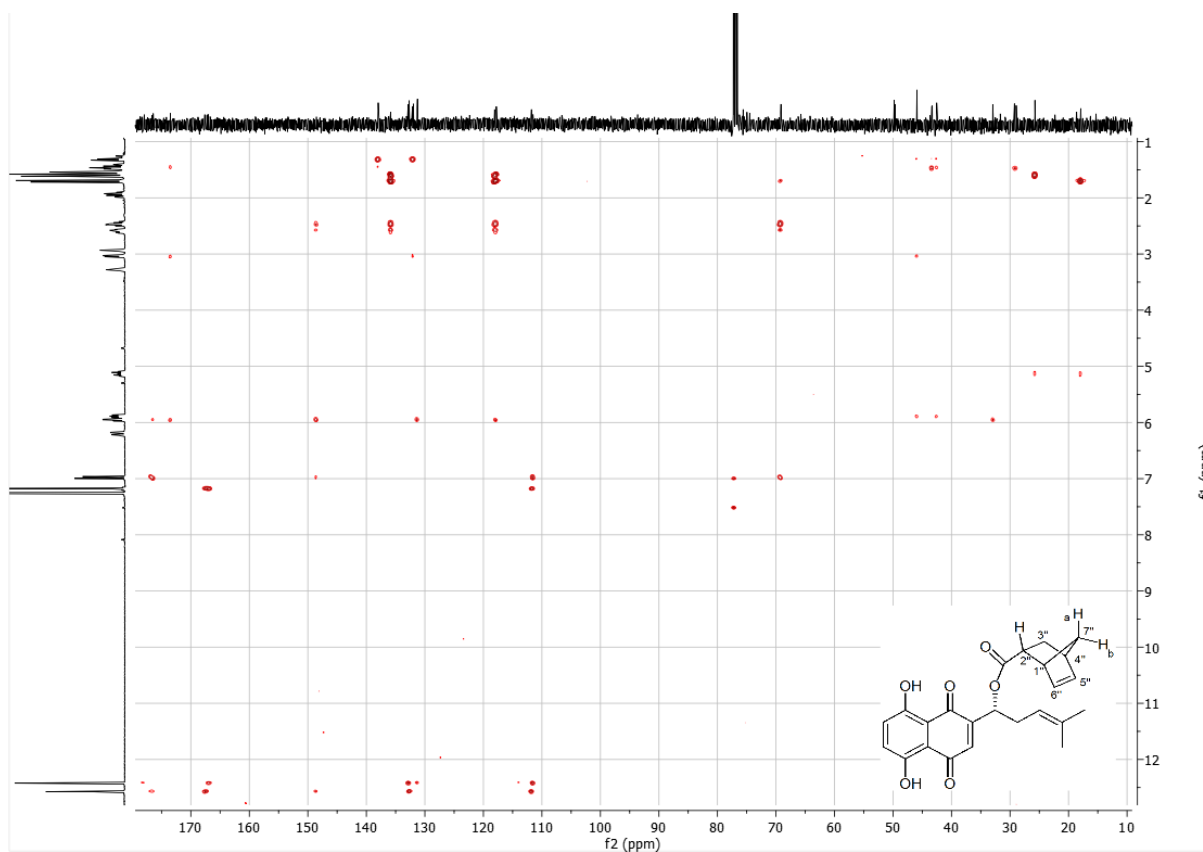

199

200  $^1\text{H-NMR}$  spectrum of (*R*)-1-(1,4-dihydro-5,8-dihydroxy-1,4-dioxonaphthalen-2-yl)-4-methylpent-3-  
 201 enyl bicyclo[2.2.1]heptane-2-ylacetate (**20**):

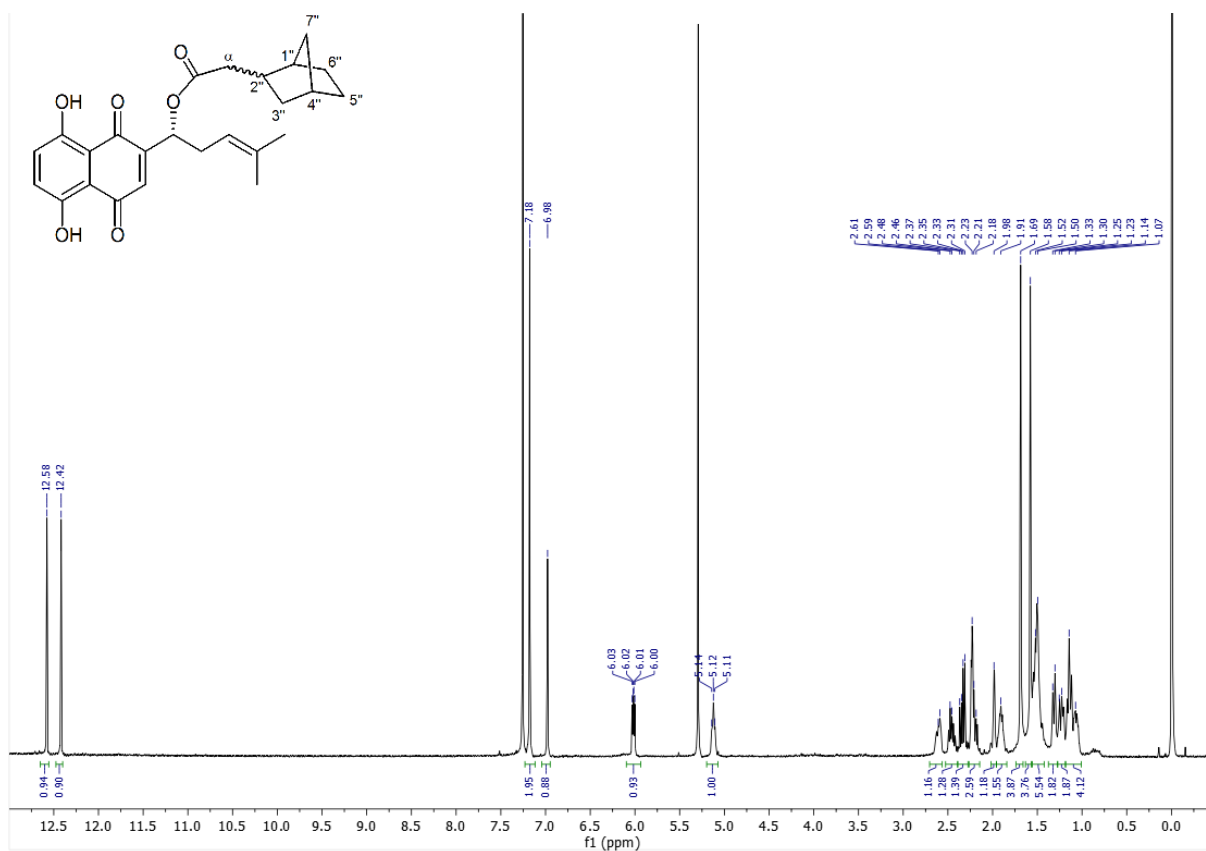

202  $^{13}\text{C-NMR}$  spectrum of (*R*)-1-(1,4-dihydro-5,8-dihydroxy-1,4-dioxonaphthalen-2-yl)-4-methylpent-3-  
 203 enyl bicyclo[2.2.1]heptane-2-ylacetate (**20**):  
 204

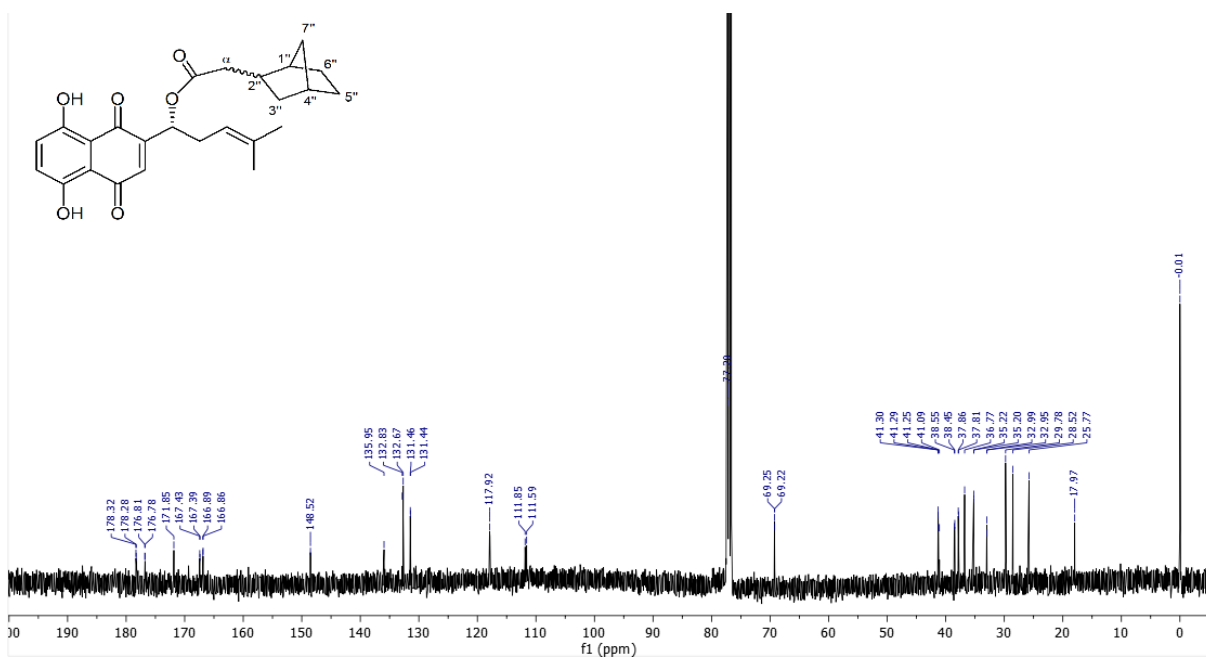

205

206

207 HMBC spectrum of (R)-1-(1,4-dihydro-5,8-dihydroxy-1,4-dioxonaphthalen-2-yl)-4-methylpent-3-enyl  
208 bicyclo[2.2.1]heptane-2-acetate (20):

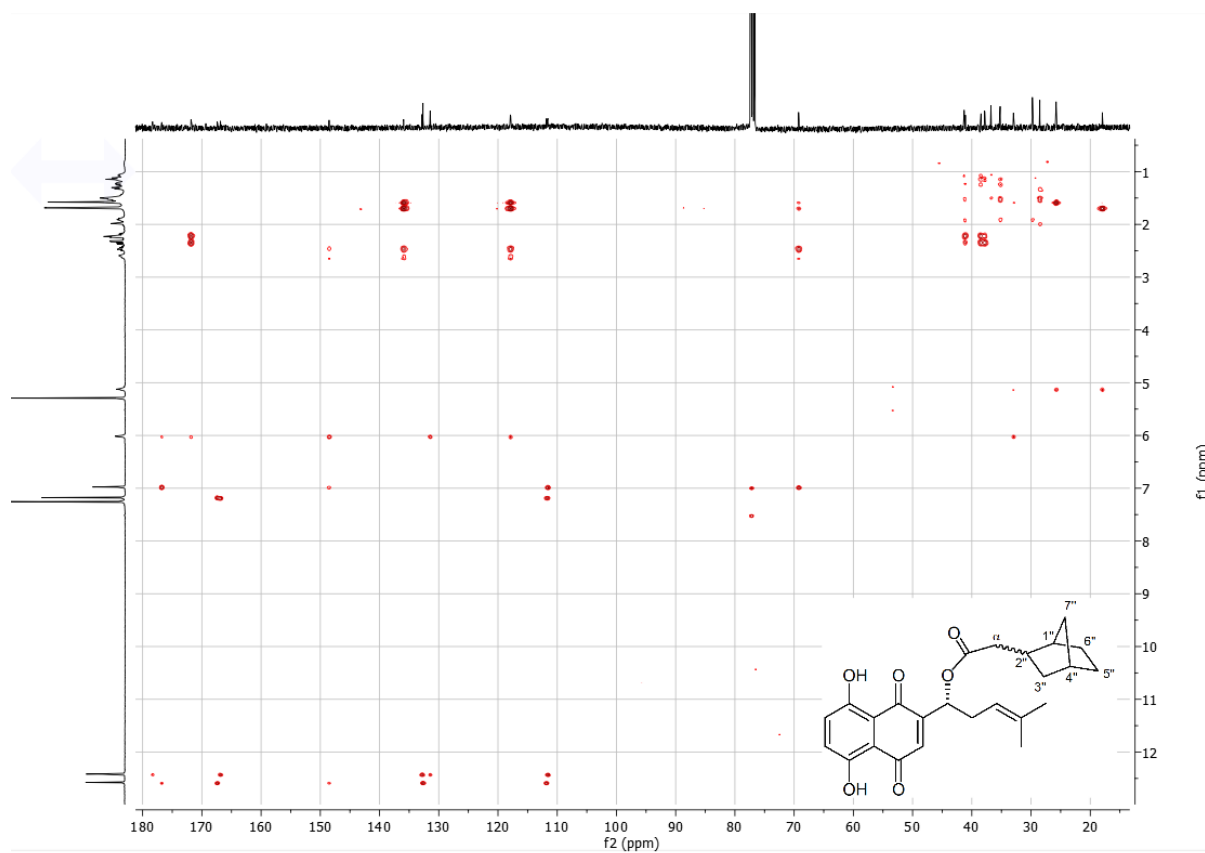

209

210



### 211 3. Syntheses of cycloalkylideneacids **2a** to **5a** and cyclobutylacetic acid (**7a**)

#### 212 *Cyclobutylideneacetic acid (2a)*

213 At 0 °C triethylphosphonoacetate (10.2 mL, 11.5 g, 51.4 mmol) was added to a suspension NaH  
214 (60% in mineral oil; 2.05 g, 66.8 mmol) in abs. Et<sub>2</sub>O (120 mL). After stirring for 5 min, a solution of  
215 cyclobutanone (3.74 mL, 3.50 g, 50 mmol) in abs. Et<sub>2</sub>O (10 mL) was added. After 4 h at room  
216 temperature, water (100 mL) was added. The organic layer was separated and the aqueous layer was  
217 extracted with Et<sub>2</sub>O (3 x 50 mL). Combined organic layers were dried over anhydrous Na<sub>2</sub>SO<sub>4</sub> and  
218 evaporated resulting in 6.3 g raw ester (contained ca. 20 % ethyl cyclopentenylacetate) which was used  
219 for the next reaction without further purification.

220 A solution of LiOH · H<sub>2</sub>O (4.20 g, 100 mmol) in water (25 mL) was added to a solution of raw  
221 ethyl cyclobutylideneacetate (1.40 g, 10 mmol) in THF (25 mL). The mixture was stirred for 18 h at room  
222 temperature. TLC showed very little conversion. THF, water and MeOH (10 mL each), were added  
223 and the mixture was stirred for further three days. No starting material was visible in TLC. The  
224 mixture was concentrated under reduced pressure to about 30 mL, washed with ether (2 x 10 mL),  
225 acidified with conc. HCl (ca. 8 mL) and extracted with Et<sub>2</sub>O (3 x 10 mL). This extract was dried over  
226 anhydrous Na<sub>2</sub>SO<sub>4</sub> and evaporated. 580 mg of the raw product (0.99 g) were purified by CC (silica,  
227 cyclohexane / EtOAc = 3:1 to 2:1) resulting in 352 mg cyclobutylideneacetic acid (**2a**) (54%).

228 <sup>1</sup>H-NMR (CDCl<sub>3</sub>): δ 2.11 (quint, *J* = 8.0 Hz, 2H, CH<sub>2</sub>CH<sub>2</sub>CH<sub>2</sub>), 2.86 (tm, *J* = 7.9 Hz, 2H, trans CH<sub>2</sub>-  
229 C=), 3.14 (tm, *J* = 8.1 Hz, 2H, cis CH<sub>2</sub>-C=), 5.59 (quint, *J* = 2.3 Hz, 1H, =CH), 11.05 (s, br, 1H, COOH);  
230 <sup>13</sup>C-NMR (CDCl<sub>3</sub>): δ 17.5 (CH<sub>2</sub>CH<sub>2</sub>CH<sub>2</sub>), 32.5, 34.1 (2 x CH<sub>2</sub>-C=), 112.0 (=CH), 171.4, 172.3 (C=CH-CO).

#### 231 *Cyclopentylideneacetic acid (3a) and 2-cyclopentenyl acetic acid (3b)*

232 At 0 °C triethylphosphonoacetate (10.2 mL, 11.5 g, 51.4 mmol) was added to a suspension NaH  
233 (60% in mineral oil; 2.05 g, 66.8 mmol) in abs. Et<sub>2</sub>O (120 mL). After stirring for 5 min, a solution of  
234 cyclopentanone (4.43 mL, 4.21 g, 50 mmol) in abs. Et<sub>2</sub>O (10 mL) was added. After 4 h (stirrer stuck  
235 after ca. 1 h) at room temperature, water (100 mL) was added. The organic layer was separated and  
236 the aqueous layer was extracted with Et<sub>2</sub>O (3 x 50 mL). Combined organic layers were dried over  
237 anhydrous Na<sub>2</sub>SO<sub>4</sub> and evaporated resulting in 8.1 g raw ester (ethyl cyclopentylideneacetate with ca.  
238 20 % ethyl 2-cyclopentenylacetate) which was used for the next reaction without further purification.

239 0.22 g (5.2 mmol) LiOH · H<sub>2</sub>O in 20 mL water was added to a solution of 0.77 g (5 mmol) raw  
240 ethyl cyclopentylideneacetate in THF (25 mL) and MeOH (10 mL). After stirring for 2 h at 50 °C (bath  
241 temperature), the mixture was concentrated under reduced pressure to approx. 25 mL, washed with  
242 ether (3 x 10 mL), acidified with conc. HCl (ca. 0.4 mL) and extracted with ether (3 x 10 mL). The  
243 combined extracts were dried over Na<sub>2</sub>SO<sub>4</sub> and concentrated under reduced pressure. The residue  
244 consisted in 500 mg of a mixture of **3a** and **3b** (1 : 3; 79 %).

245 The raw product was submitted to CC (silica, cyclohexane / EtOAc = 3 : 1 to 2 : 1) resulting in 66  
246 mg **3a** (10 %), **3b** 100 mg (16 %) and 66 mg of an isomeric mixture (10 %).

247 Cyclopentylideneacetic acid (**3a**): <sup>1</sup>H-NMR (CDCl<sub>3</sub>): δ 1.63-1.80 (m, 4H, CH<sub>2</sub>CH<sub>2</sub>CH<sub>2</sub>CH<sub>2</sub>), 2.47  
248 (tm, *J* = 7.1 Hz, 2H, trans CH<sub>2</sub>-C=), 2.78 (tm, *J* = 7.1 Hz, 2H, cis CH<sub>2</sub>-C=), 5.83 (s, 1H, =CH), 11.63 (s, br,  
249 1H, COOH); <sup>13</sup>C-NMR (CDCl<sub>3</sub>): δ 25.4, 26.3 (CH<sub>2</sub>CH<sub>2</sub>CH<sub>2</sub>CH<sub>2</sub>), 33.0 (cis CH<sub>2</sub>-C=), 36.3 (trans CH<sub>2</sub>-C=),  
250 111.1 (=CH), 172.6, 173.0 (C=CH-COO).

251 2-Cyclopentenylacetic acid (**3b**): <sup>1</sup>H-NMR (CDCl<sub>3</sub>): δ 1.91 (quint, *J* = 7.5 Hz, 2H, H-4), 2.35 (t, *J* = 7.5  
252 Hz, 4H, H-3 and H-5), 3.17 (s, 2H, CH<sub>2</sub>-α), 5.59 (sm, 1H, =CH), 11.25 (s, vbr, 1H, COOH); <sup>13</sup>C-NMR  
253 (CDCl<sub>3</sub>): δ 23.4, (C-4), 32.5 (C-α), 35.0, 36.7 (C-3 and C-5), 128.9 (C-2), 135.8 (C-1), 178.2 (COO).

254 *Cyclohexylideneacetic acid (4a)*

255 Diethylphosphit (1.29 mL, 1.38 mg, 10 mmol) was added to a suspension of NaH (60 % in mineral  
256 oil; 1.20 g, 30 mmol) in abs. glyme (32 mL). After stirring for 10 min, a solution of chloroacetic acid  
257 (945 mg, 10 mmol) in abs. glyme (10 mL) was added and stirred for 40 min till gas evolution had  
258 ceased. Cyclohexanone (1.03 mL, 980 mg, 10 mmol) was added. After stirring for further 90 min and  
259 addition of EtOH (1.7 mL), the mixture was poured into water (160 mL). Washing with Et<sub>2</sub>O (4 x 50  
260 mL), acidification with conc. HCl (ca. 3 mL), extraction with Et<sub>2</sub>O (4 x 50 mL), drying over anhydrous  
261 Na<sub>2</sub>SO<sub>4</sub> and evaporation resulted in 707 mg raw product. 668 mg of this material was submitted to CC  
262 (silica, cyclohexane / EtOAc = 3:1) resulting in 261 mg cyclohexylideneacetic acid (**4a**) (20 %).

263 <sup>1</sup>H-NMR (CDCl<sub>3</sub>): δ 1.56-1.71 (m, 6H, 3 x CH<sub>2</sub>), 2.22 (t, J = 6.0 Hz, 2H, trans CH<sub>2</sub>-C=), 2.83 (t, J = 5.8  
264 Hz, 2H, cis CH<sub>2</sub>-C=), 5.70 (quint, J = 1.2 Hz, 1H, =CH), 11.15 (s, br, 1H, COOH); <sup>13</sup>C-NMR (CDCl<sub>3</sub>): δ  
265 26.1, 27.8, 28.6 (3 x CH<sub>2</sub>), 30.1 (cis CH<sub>2</sub>-C=), 38.3 (trans CH<sub>2</sub>-C=), 115.2 (=CH), 167.5 (C=CH-CO), 172.6  
266 (CO).

267 *Cycloheptylideneacetic acid (5a)*

268 Diethylphosphit (0.78 mL, 872 mg, 6.31 mmol) was added to a suspension of NaH (60 % in  
269 mineral oil; 1.10 g, 27.5 mmol) in abs. glyme (20 mL). After stirring for 10 min, a solution of  
270 chloroacetic acid (570 mg, 6.03 mmol) in abs. glyme (7 mL) was added and stirred for 30 min till gas  
271 evolution had ceased. Cycloheptanone (0.71 mL, 677 mg, 6.03 mmol) was added. After stirring for  
272 further 3 h and addition of EtOH (1 mL), the mixture was poured into water (100 mL). Washing with  
273 Et<sub>2</sub>O (2 x 50 mL), acidification with conc. HCl to pH=4, extraction with Et<sub>2</sub>O (4 x 30 mL), drying over  
274 anhydrous Na<sub>2</sub>SO<sub>4</sub> and evaporation resulted in 360 mg raw product. 300 mg of this material was  
275 submitted to CC (silica, cyclohexane / EtOAc = 3:1 to 2:1) resulting in 85 mg cycloheptylideneacetic  
276 acid (**5a**) (11 %).

277 <sup>1</sup>H-NMR (CDCl<sub>3</sub>): δ 1.50-1.58 (m, 4H, CH<sub>2</sub>CH<sub>2</sub>CH<sub>2</sub>CH<sub>2</sub>), 1.62-1.72 (m, 4H, CH<sub>2</sub>CH<sub>2</sub>CH<sub>2</sub>CH<sub>2</sub>), 2.40  
278 (ddd, J = 6.0, ~4.5, 0.6 Hz, 2H, trans CH<sub>2</sub>-C=), 2.88 (ddd, J = 6.2, ~5, 1.2 Hz, 2H, cis CH<sub>2</sub>-C=), 5.63 (s, 1H,  
279 =CH), 11.7 (s, br, 1H, COOH); <sup>13</sup>C-NMR (CDCl<sub>3</sub>): δ 26.4, 27.9, 28.9, 29.7 (4 x CH<sub>2</sub>), 32.3 (cis CH<sub>2</sub>-C=), 39.2  
280 (trans CH<sub>2</sub>-C=), 115.2 (=CH), 169.9 (C=CH-CO), 172.0 (CO).

281 *Cyclobutylacetic acid (7a)*

282 Blank magnesium chips (370 mg, 15.2 mmol) were covered with abs. THF (ca. 0.5 mL). Two drops  
283 (bromomethyl)cyclobutane (from 2.09 g, 14.0 mmol) were added. As the reaction started, the rest of  
284 the bromide was solved in abs. THF (4 mL) and the solution was added dropwise with stirring. After  
285 addition, the mixture was allowed to stand for 18 h at room temperature. The mixture was diluted  
286 abs. THF (10 mL), warmed near to reflux und slowly poured on crushed dry ice (100 mL). After  
287 warming up to about 0 °C and addition of EtOAc (10 mL), the mixture was washed with 2 M HCl (10  
288 mL) and saturated with NaCl. The organic layer was separated and the aqueous layer was extracted  
289 with EtOAc (10 mL), the combined organic layers were dried over Na<sub>2</sub>SO<sub>4</sub> and concentrated under  
290 reduced pressure resulting in 1.02 g cyclobutylacetic acid (**7a**) (64 %).

291 <sup>1</sup>H-NMR (CDCl<sub>3</sub>): δ 1.66-1.77 (m, 2H, trans, CH<sub>2</sub>CH<sub>2</sub>CH<sub>2</sub>), 1.79-1.95 (m, 2H, CH<sub>2</sub>CH<sub>2</sub>CH<sub>2</sub>), 2.10-  
292 2.19 (m, 2H, cis, CH<sub>2</sub>CH<sub>2</sub>CH<sub>2</sub>), 2.44 (d, J = 7.5 Hz, 2H, CH<sub>2</sub>CO), 2.68 (sept., J = 7.8 Hz, 1H, CH), 11.08 (s,  
293 br, 1H, COOH); <sup>13</sup>C-NMR (CDCl<sub>3</sub>): δ 18.4 (CH<sub>2</sub>CH<sub>2</sub>CH<sub>2</sub>), 28.1 (CH<sub>2</sub>CH<sub>2</sub>CH<sub>2</sub>), 31.9 (CH), 40.9 (C-α),  
294 179.5 (COO).

295 **4.  $^1\text{H}$  NMR-spectra of synthesized acids (400 MHz;  $\text{CDCl}_3$ ) TMS as internal standard**296  $^1\text{H}$ -NMR spectrum of cyclobutylideneacetic acid (**2a**):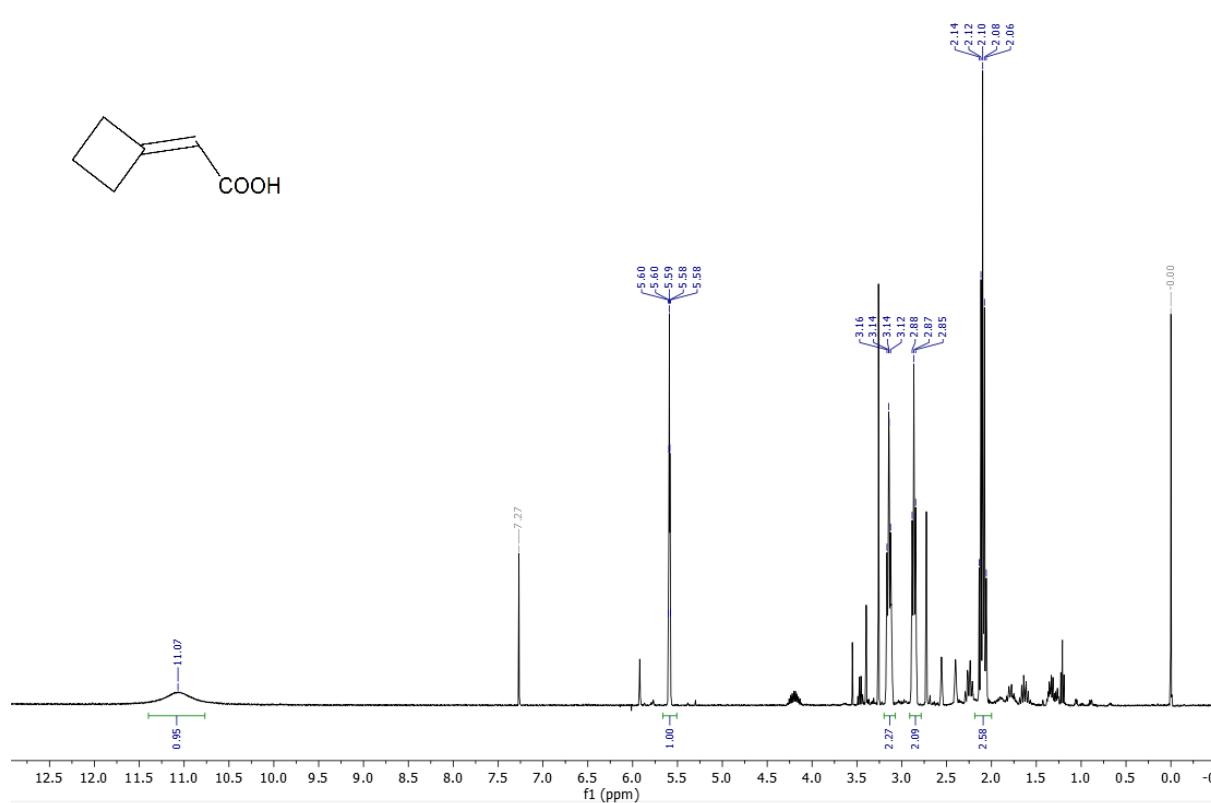

297

298  $^1\text{H}$ -NMR spectrum of cyclopentylideneacetic acid (**3a**):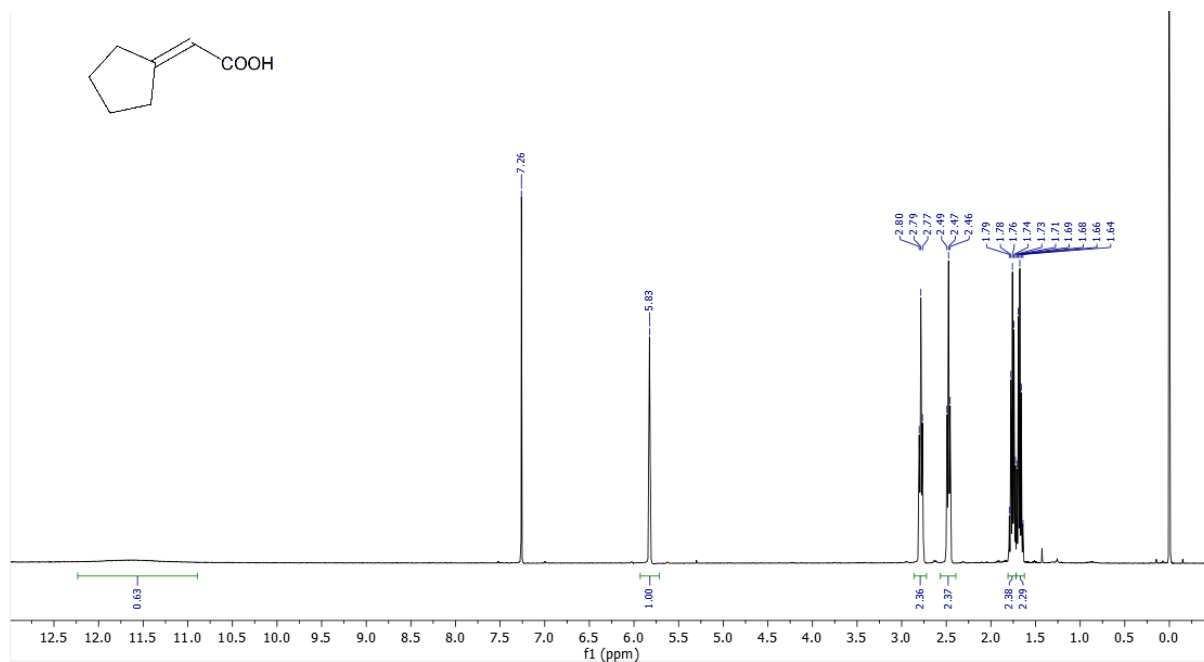

299

300  $^1\text{H-NMR}$  spectrum of 2-cyclopentenylacetic acid (**3b**):

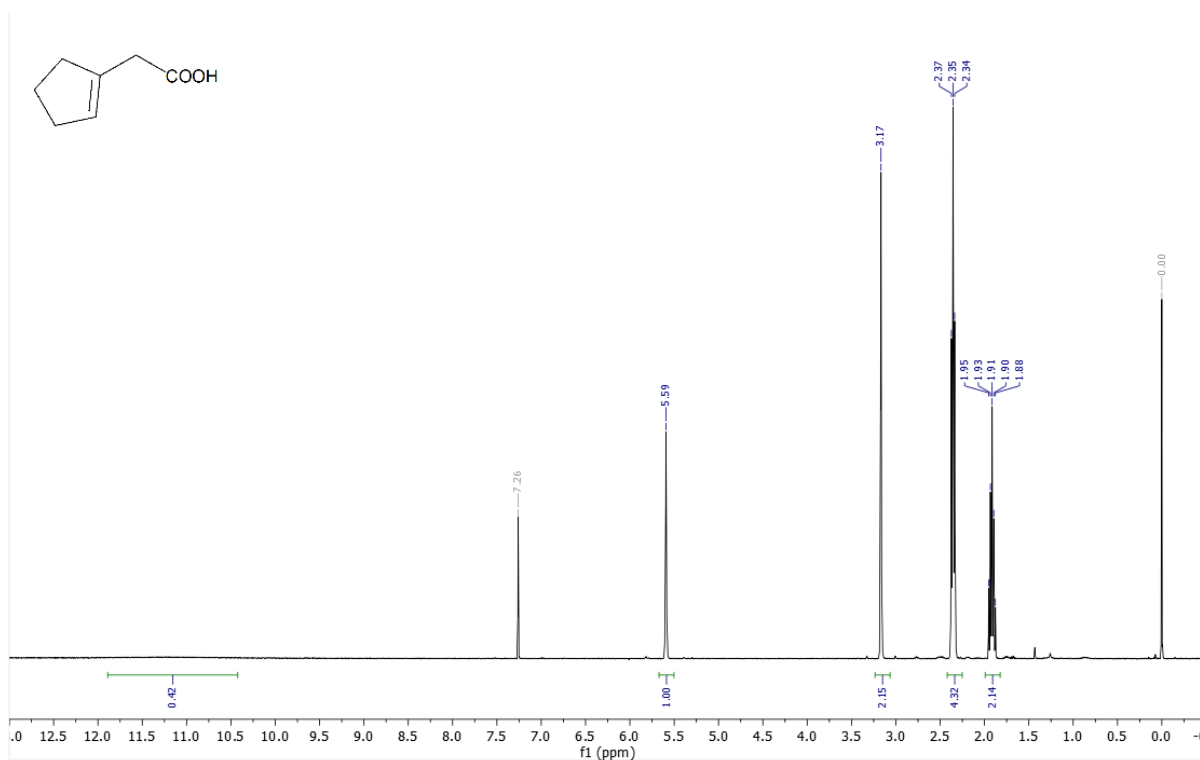

301

302  $^1\text{H-NMR}$  spectrum of cyclohexylideneacetic acid (**4a**):

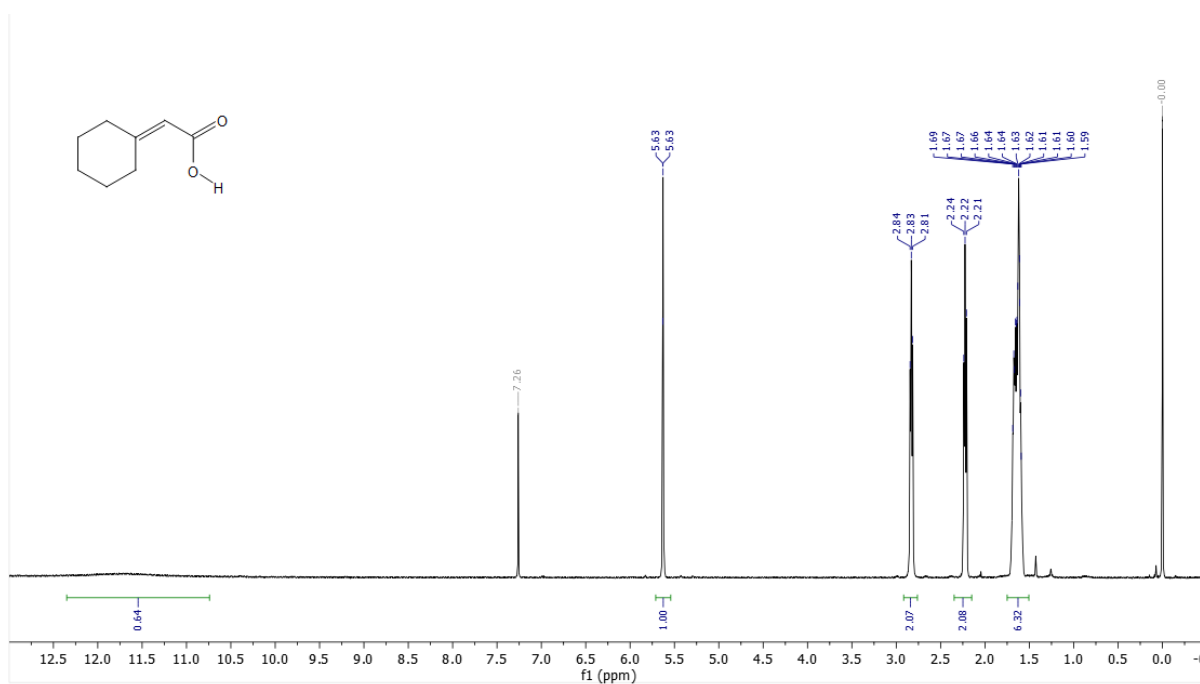

303

304

305  $^1\text{H-NMR}$  spectrum of cycloheptylideneacetic acid (**5a**):

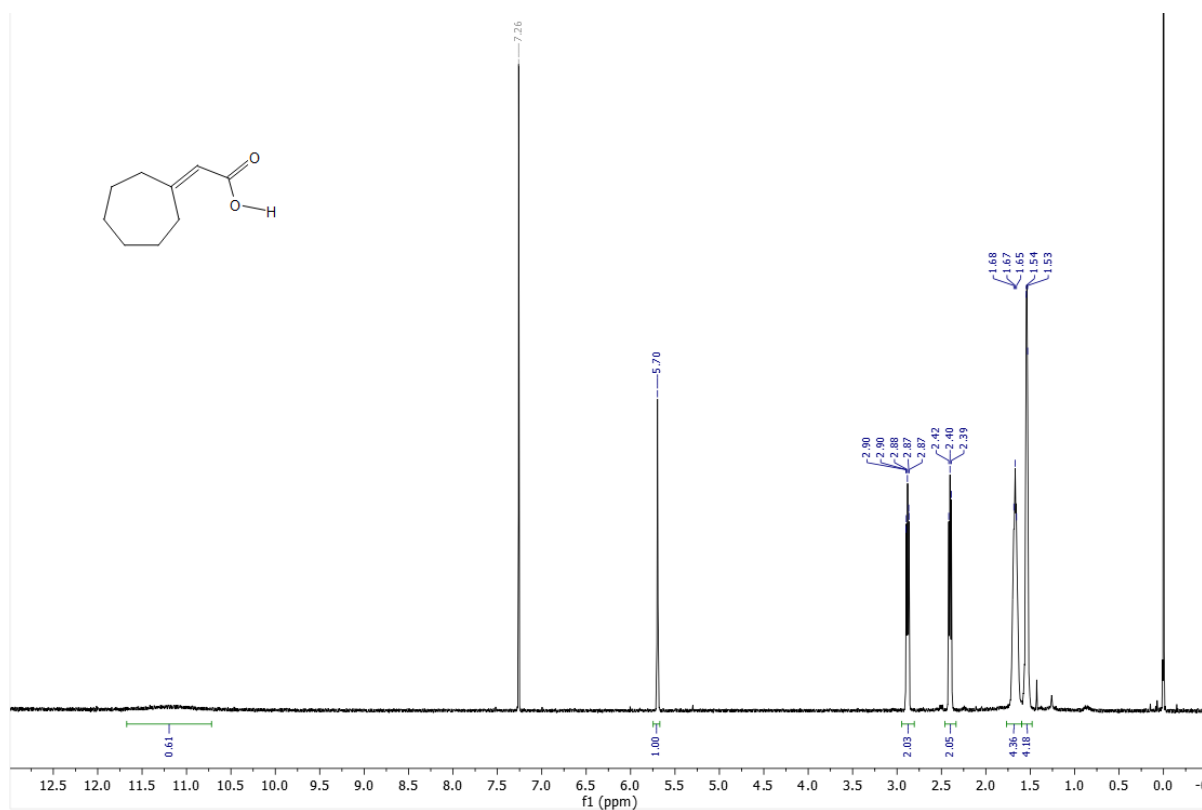

306

307  $^1\text{H-NMR}$  spectrum of cyclobutylacetic acid (**7a**):

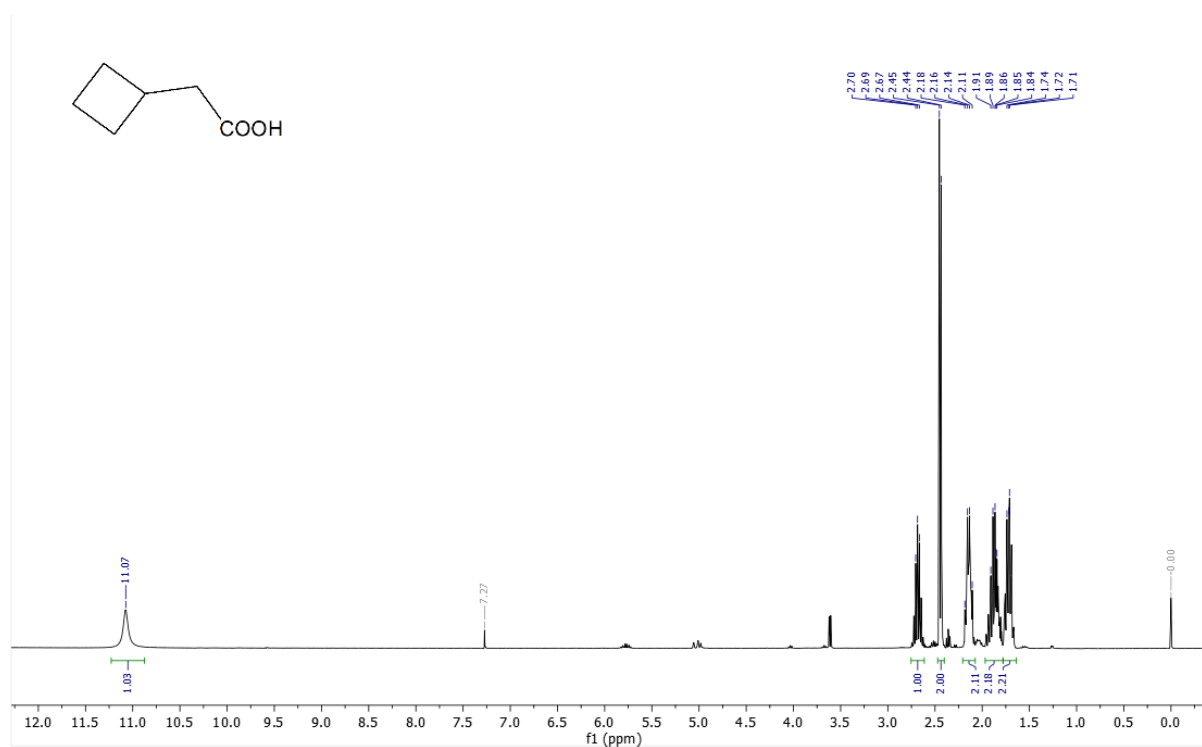

308

309

310 **5. HPLC runs of tested compounds**

311 HPLC analyses were carried out on a Dionex Ultimate 3000 UHPLC. Stationary phase: Kinetex  
312 C18 column (2.6  $\mu\text{m}$ , 100  $\times$  2.10mm) (Phenomenex Inc., Torrance, CA, USA). Mobile phase: Water (A)  
313 and acetonitrile (B); gradient: 0-45 min: 55-100 % B; flow rate: 0.2 mL/min; column temperature: 30  $^{\circ}\text{C}$ ;  
314 wavelength: 500 nm.

315

cpd

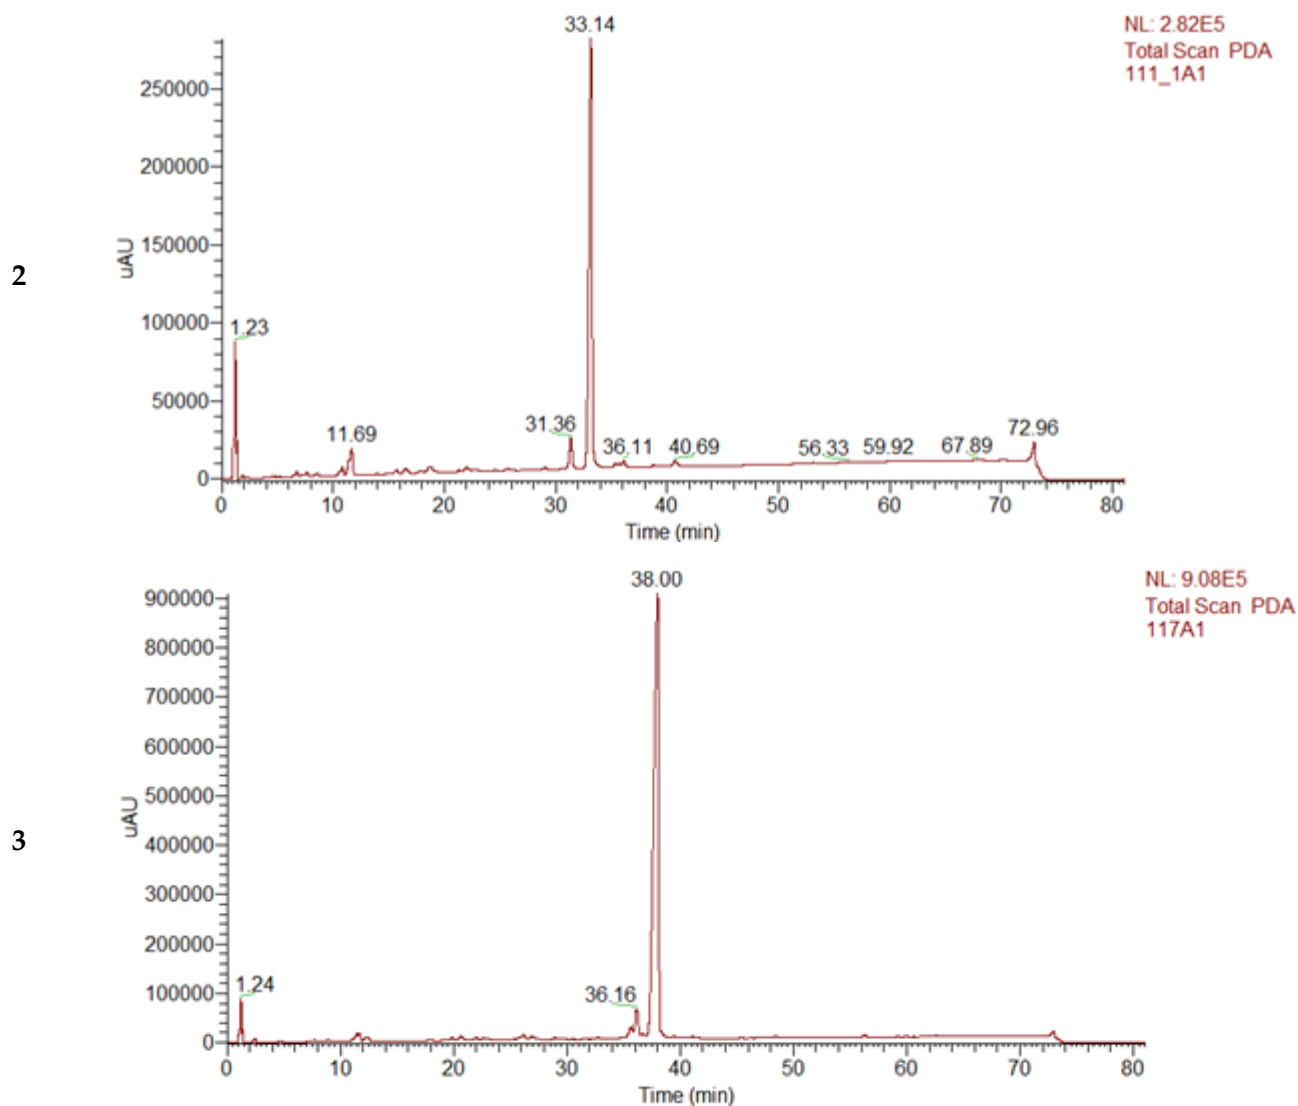

4

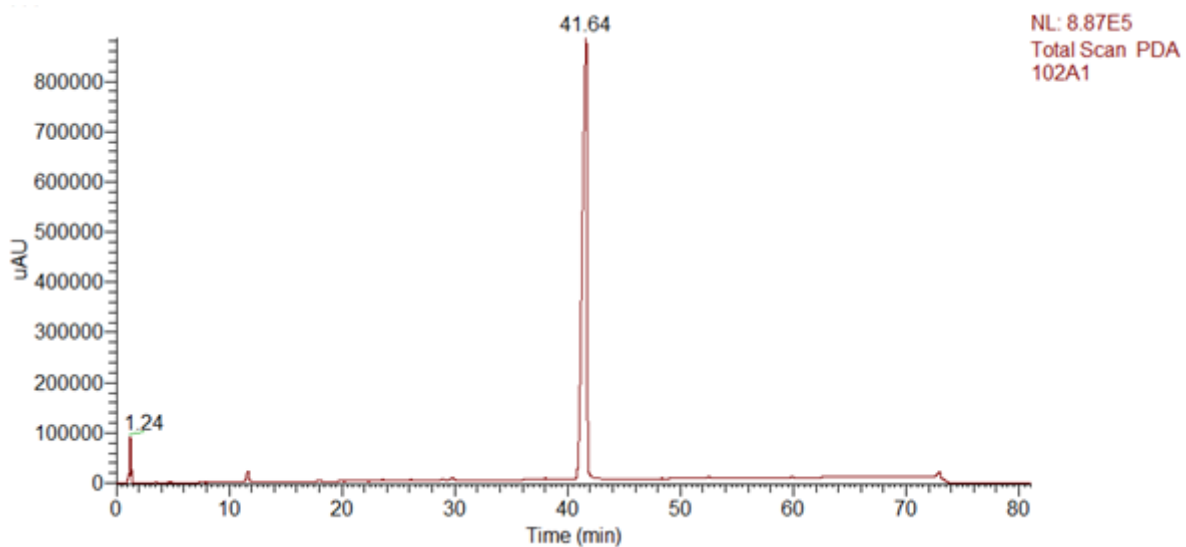

5

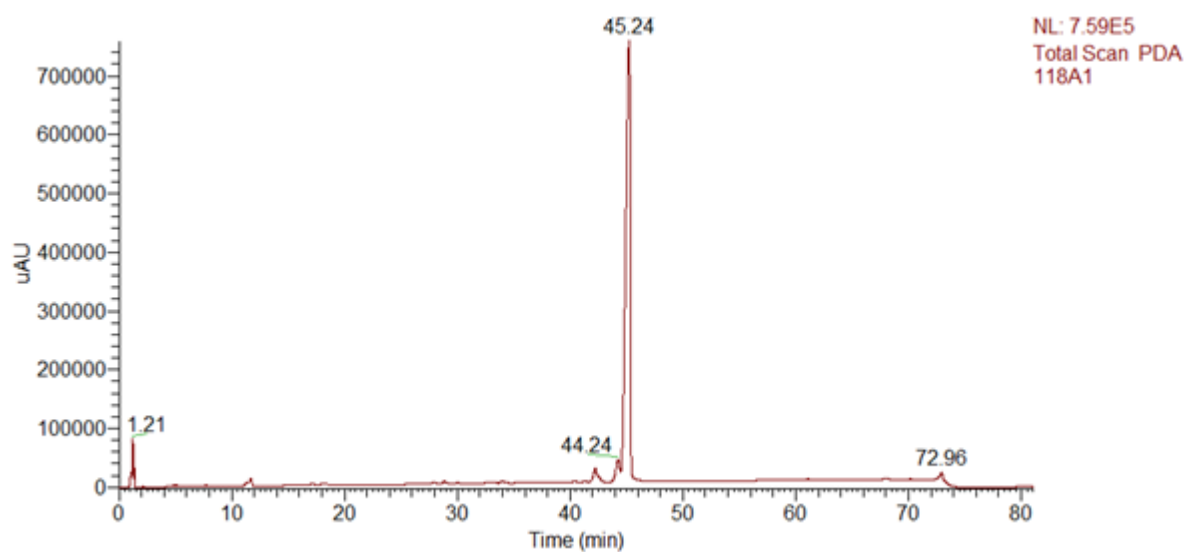

6

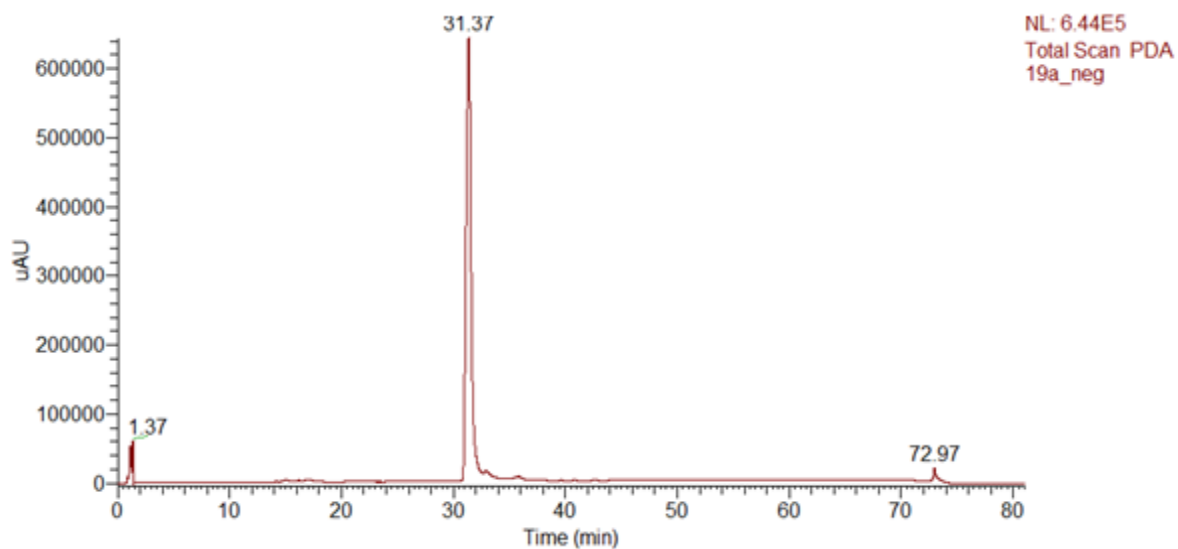

7

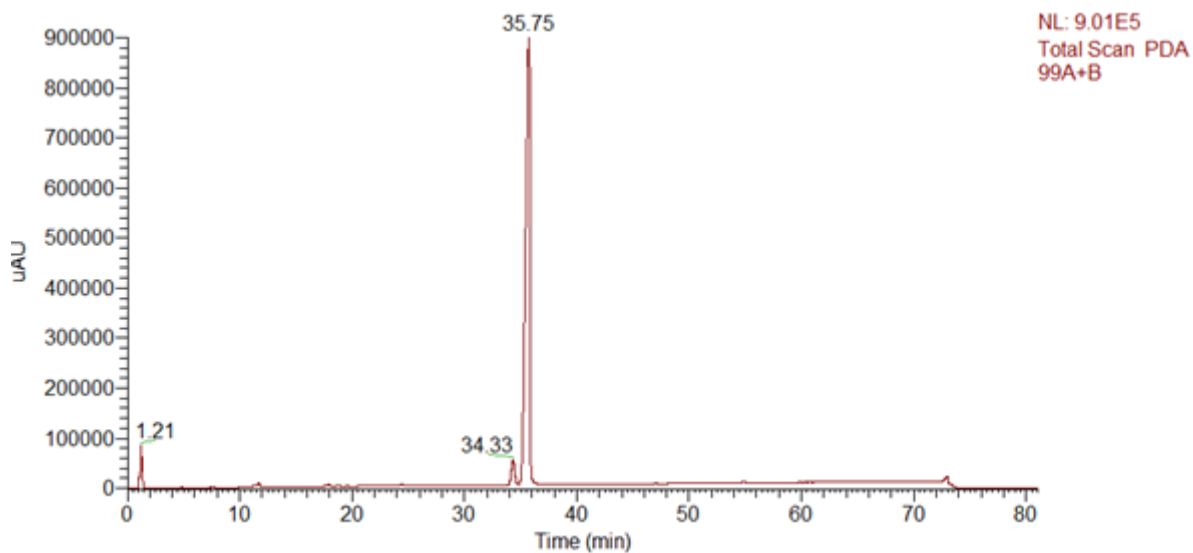

8

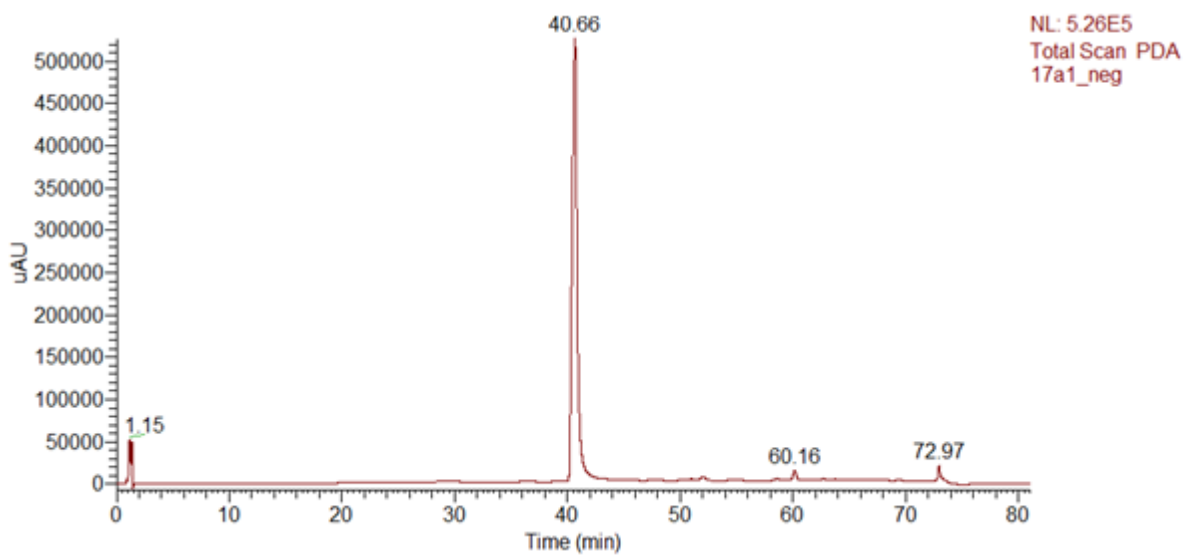

9

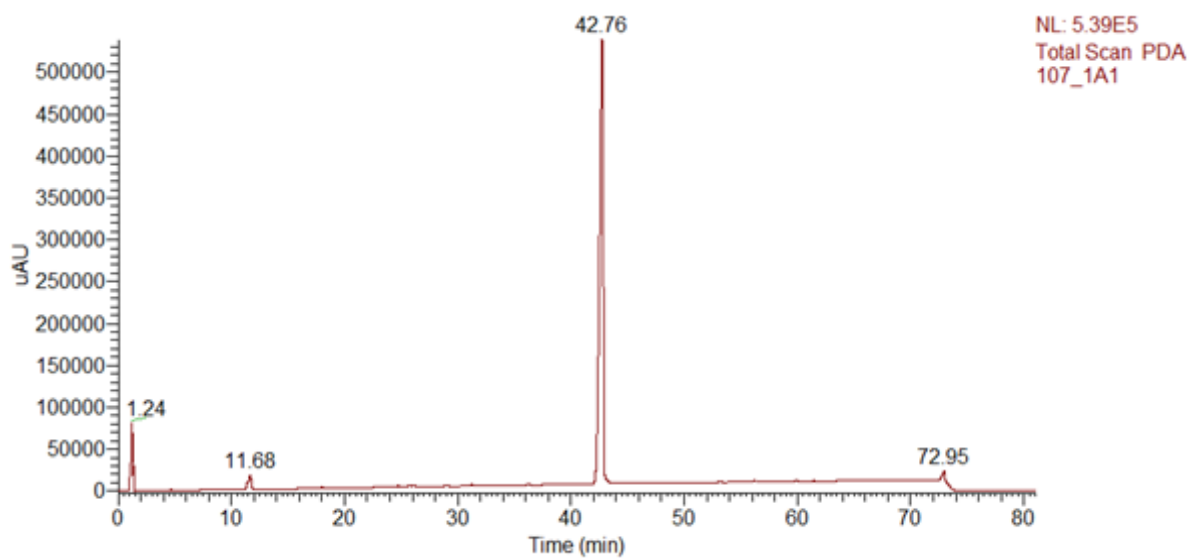



10

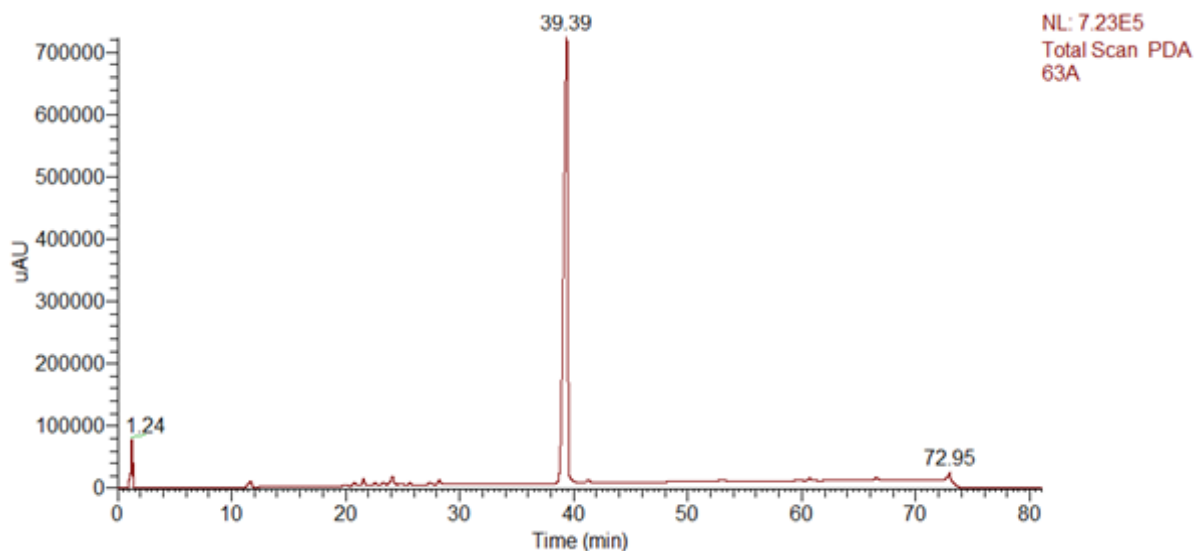

11

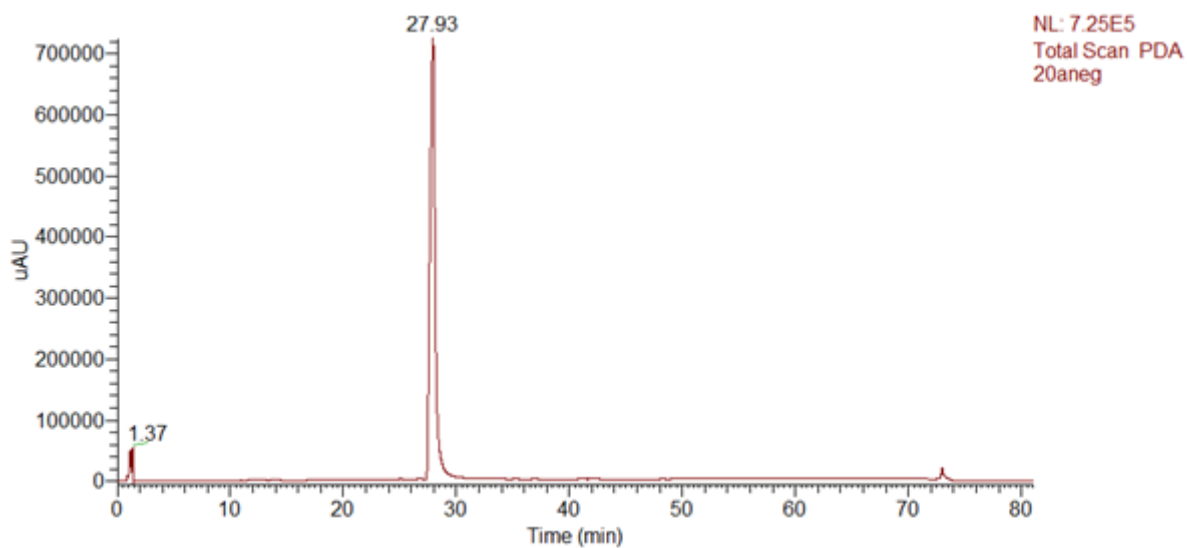

12

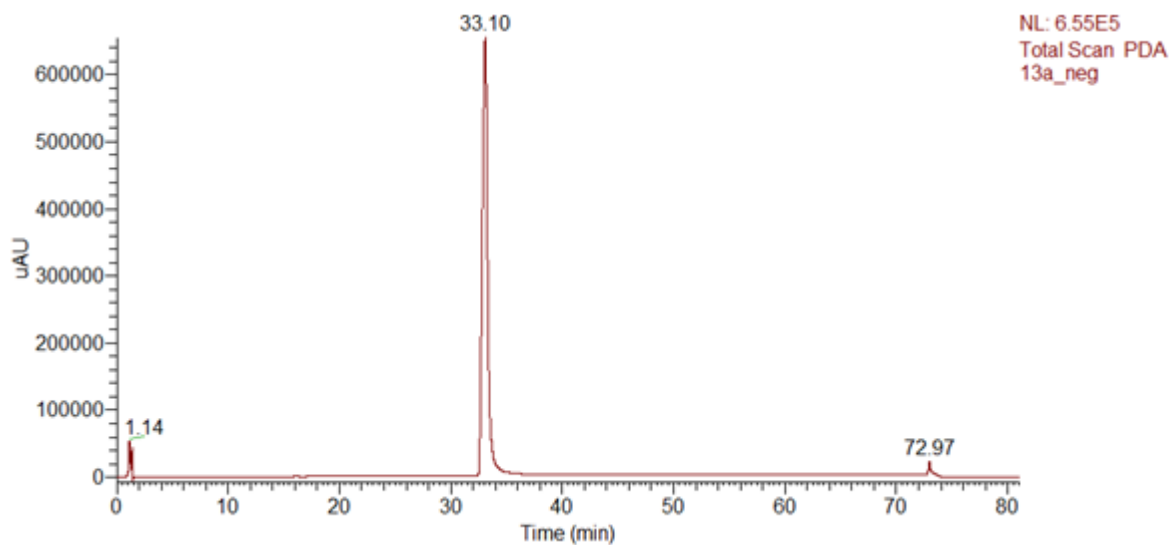

13

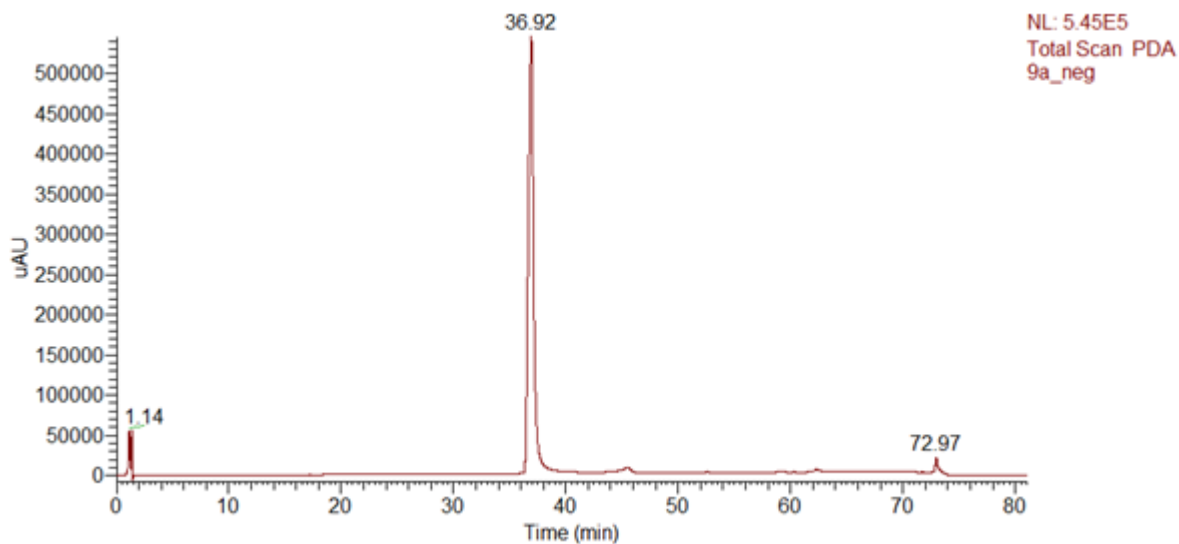

14

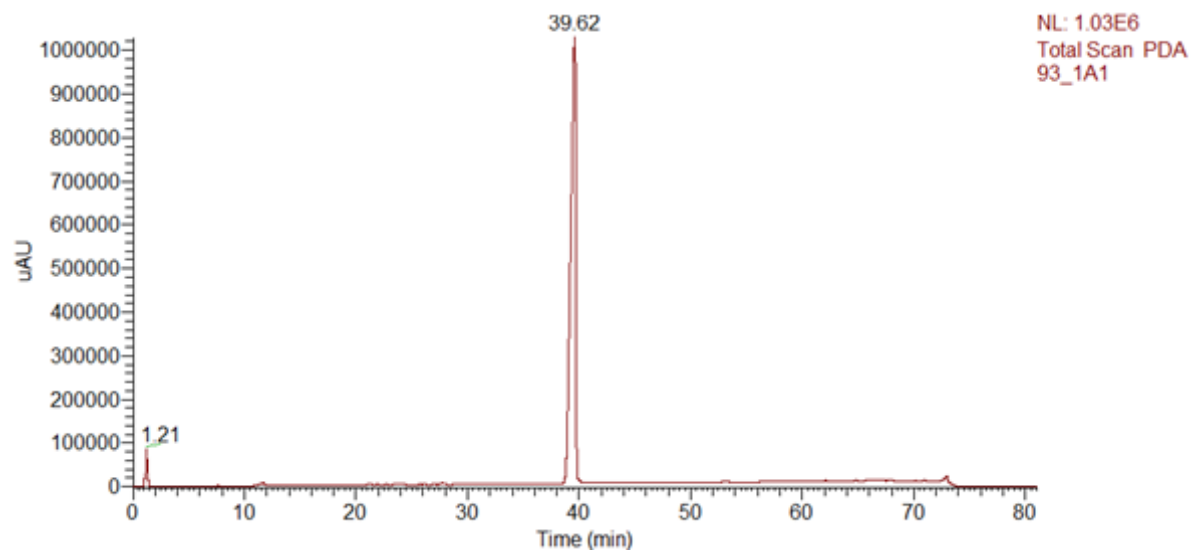

15

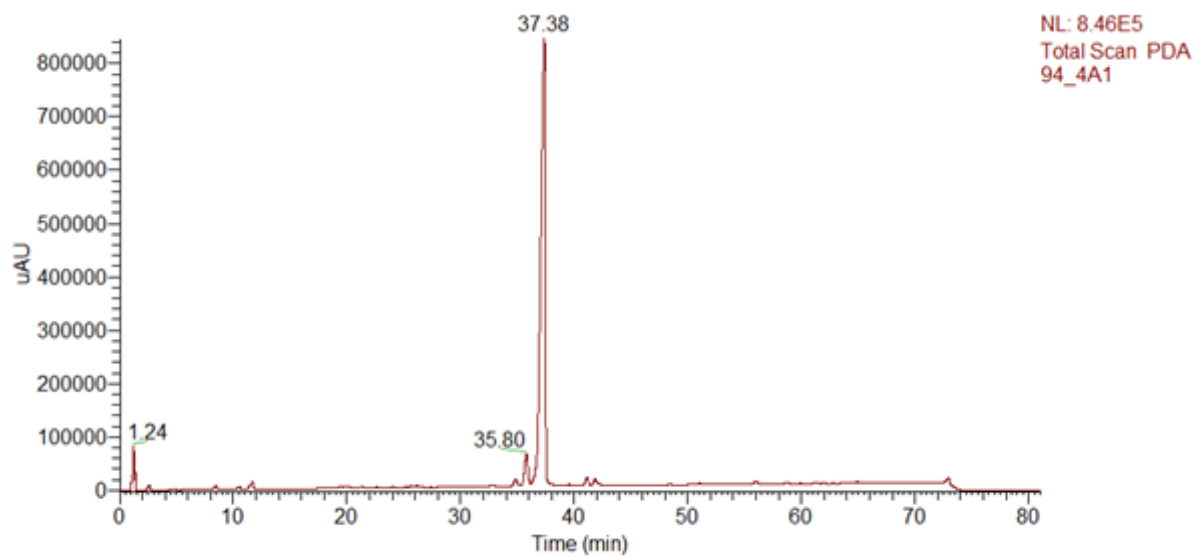

16

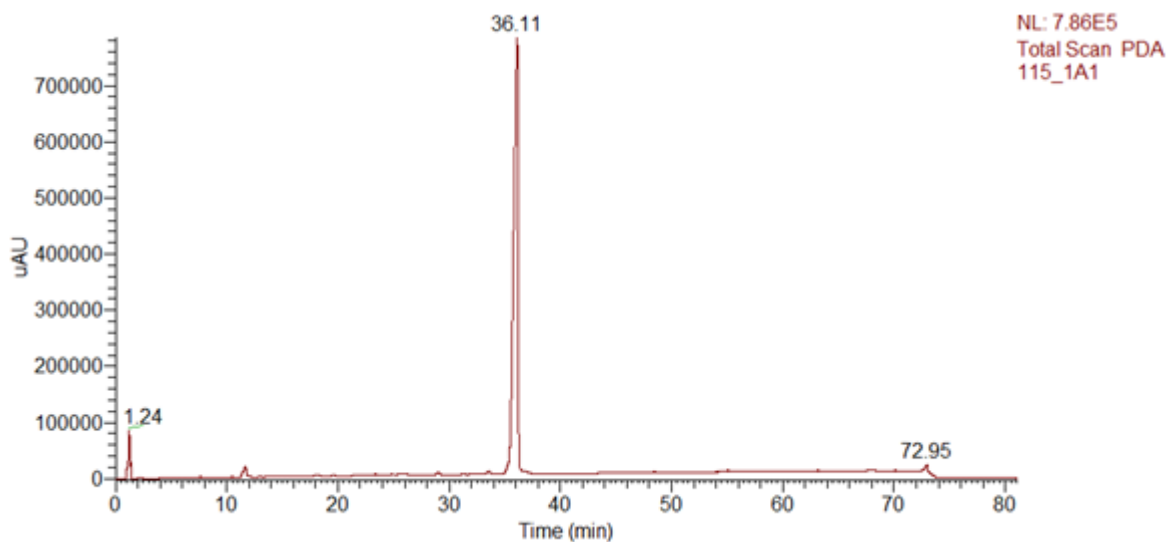

17

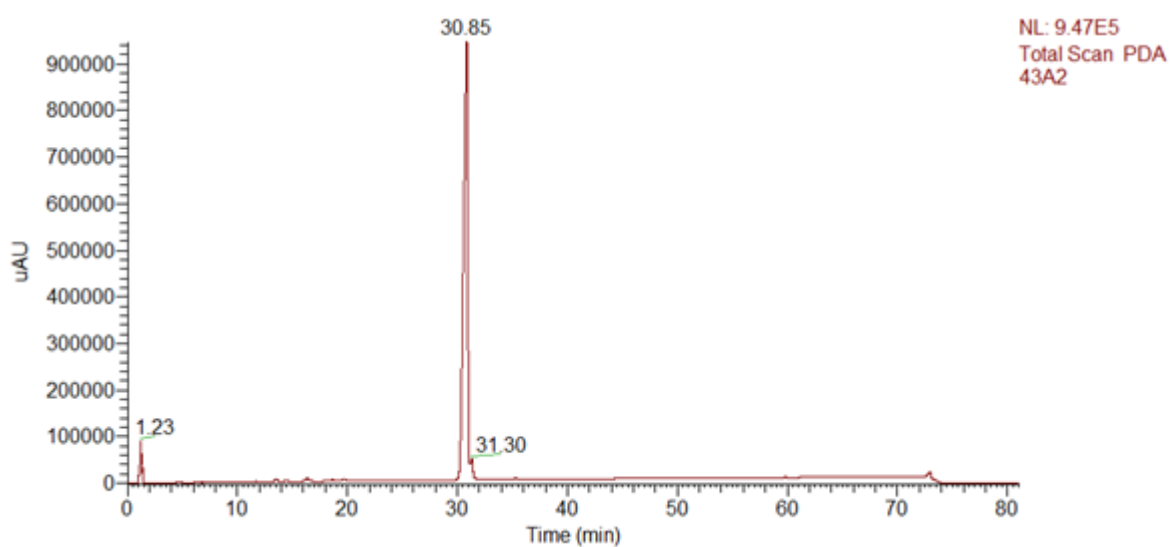

18

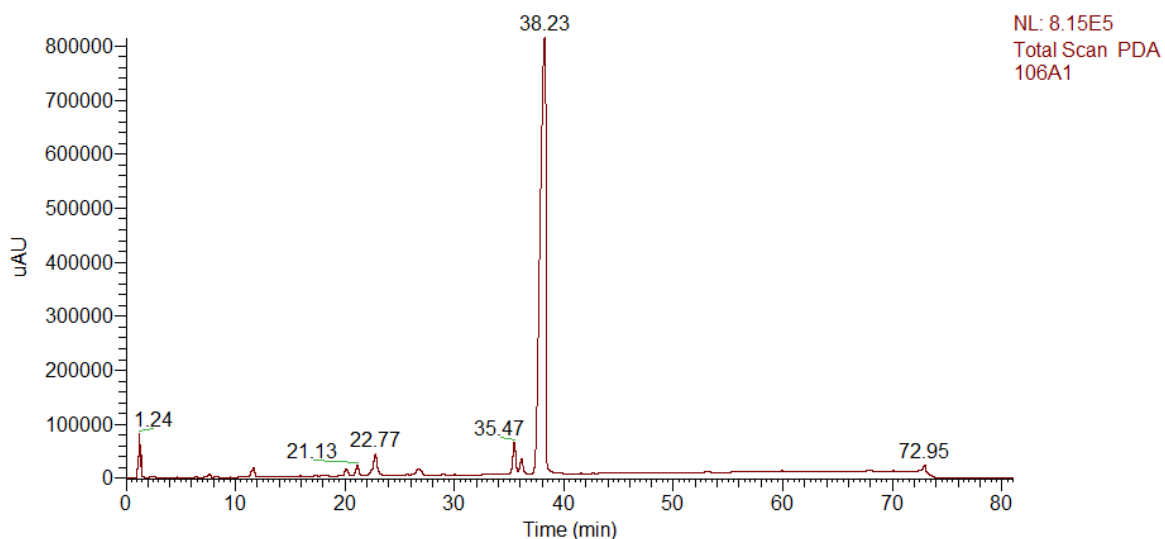

19

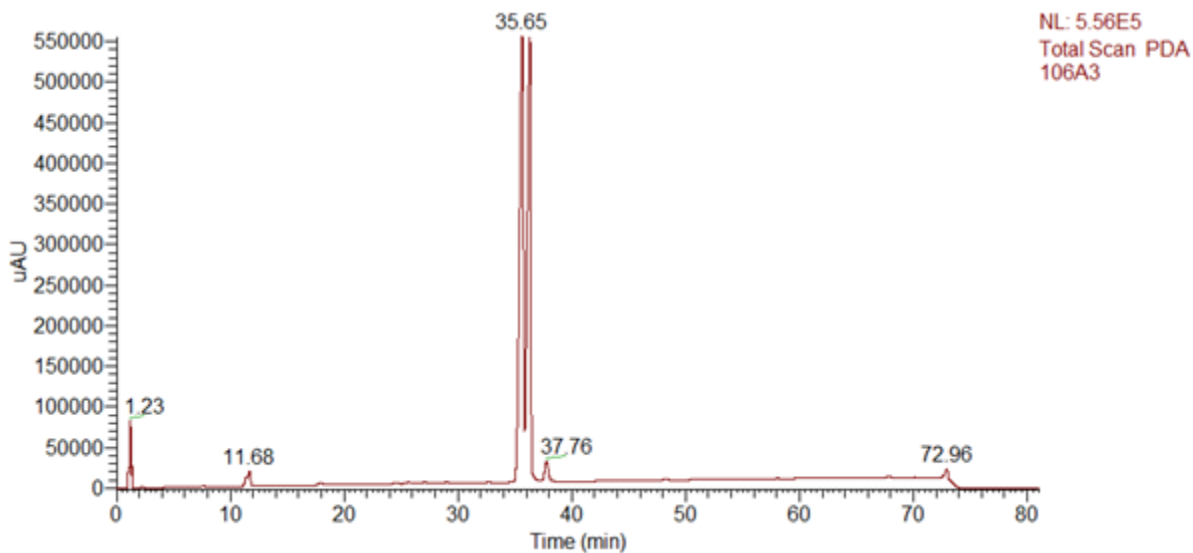

20

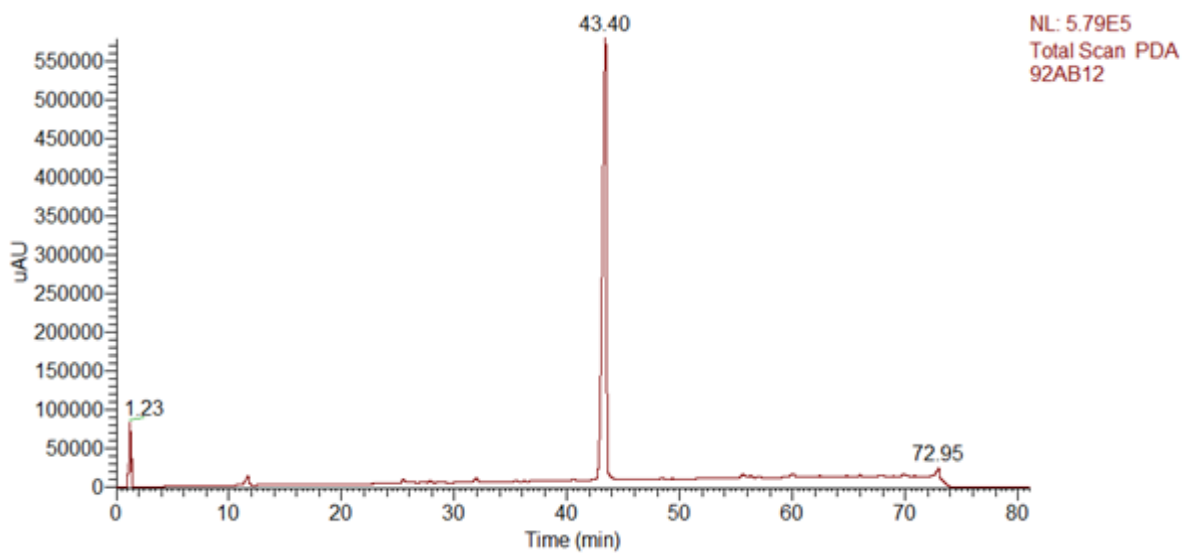

316

317

## 318 6. Results of the XTT assay of compounds 1-20

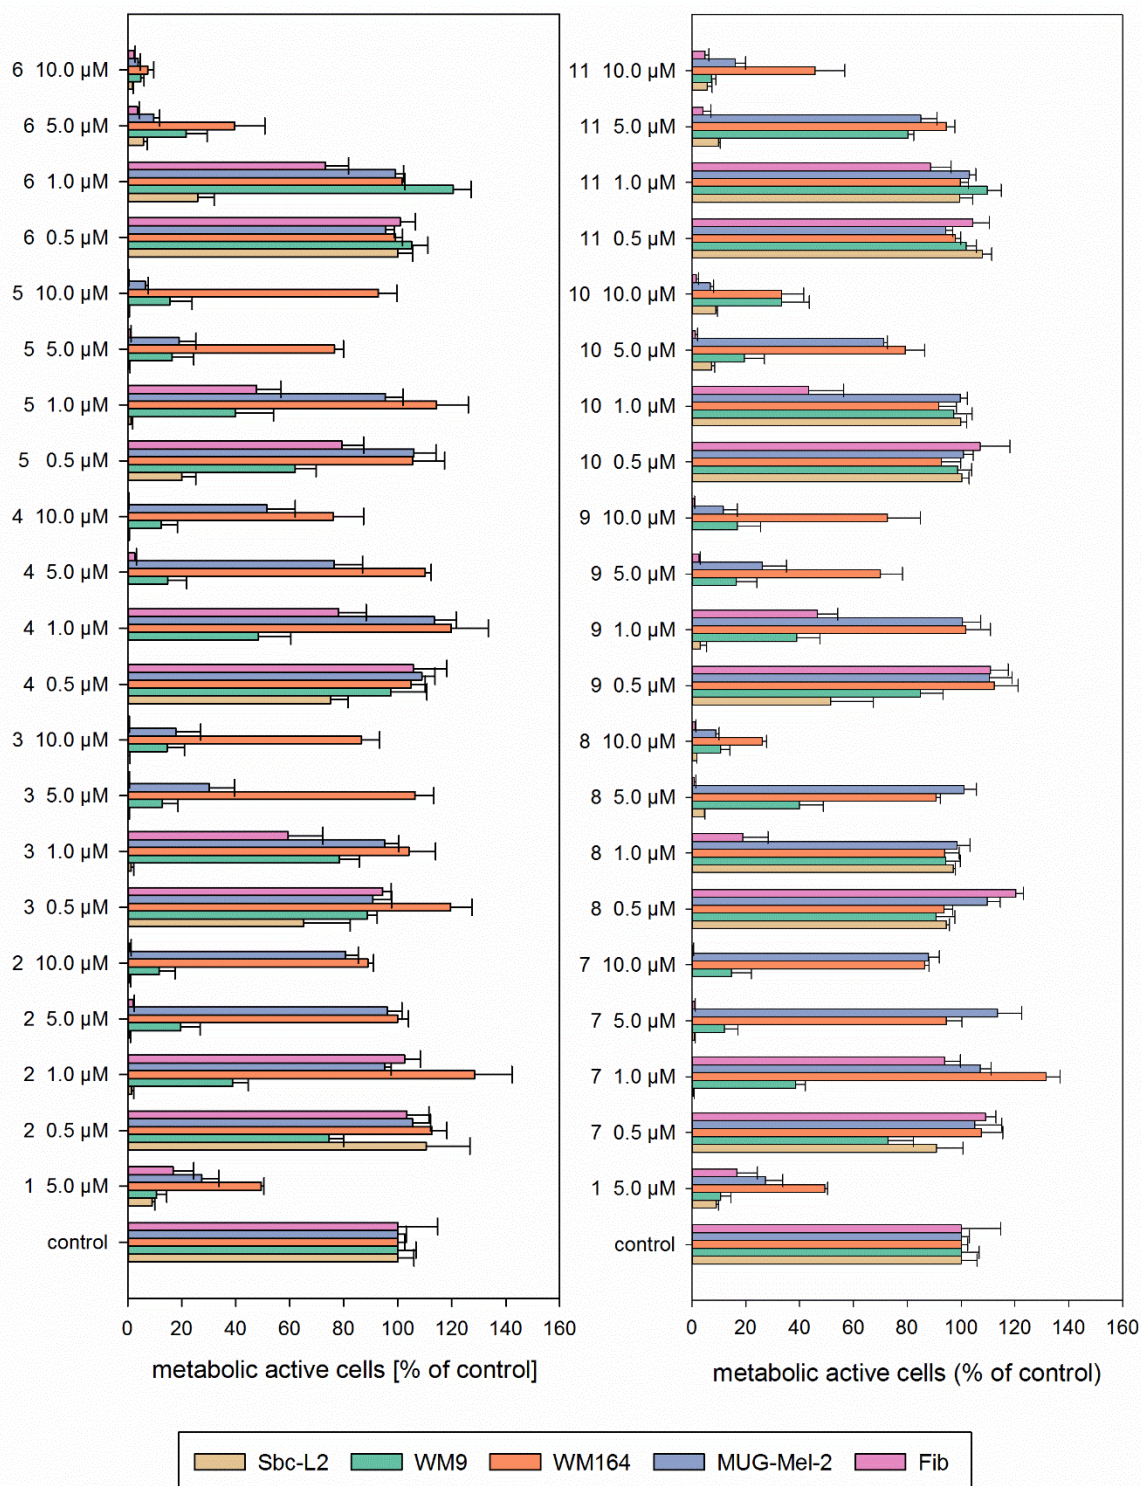

319

320 **Figure S2.** Results of the XTT assay of different concentrations of compounds **2-11** towards  
 321 melanoma cells from non-metastatic (SBcl2) and metastatic lesions (WM9, WM164, MUG-Mel2) and  
 322 skin fibroblasts (Fib) after 72 h of treatment (mean  $\pm$  SEM,  $n = 4$ ) and in comparison to 5.0  $\mu$ M of **1**.

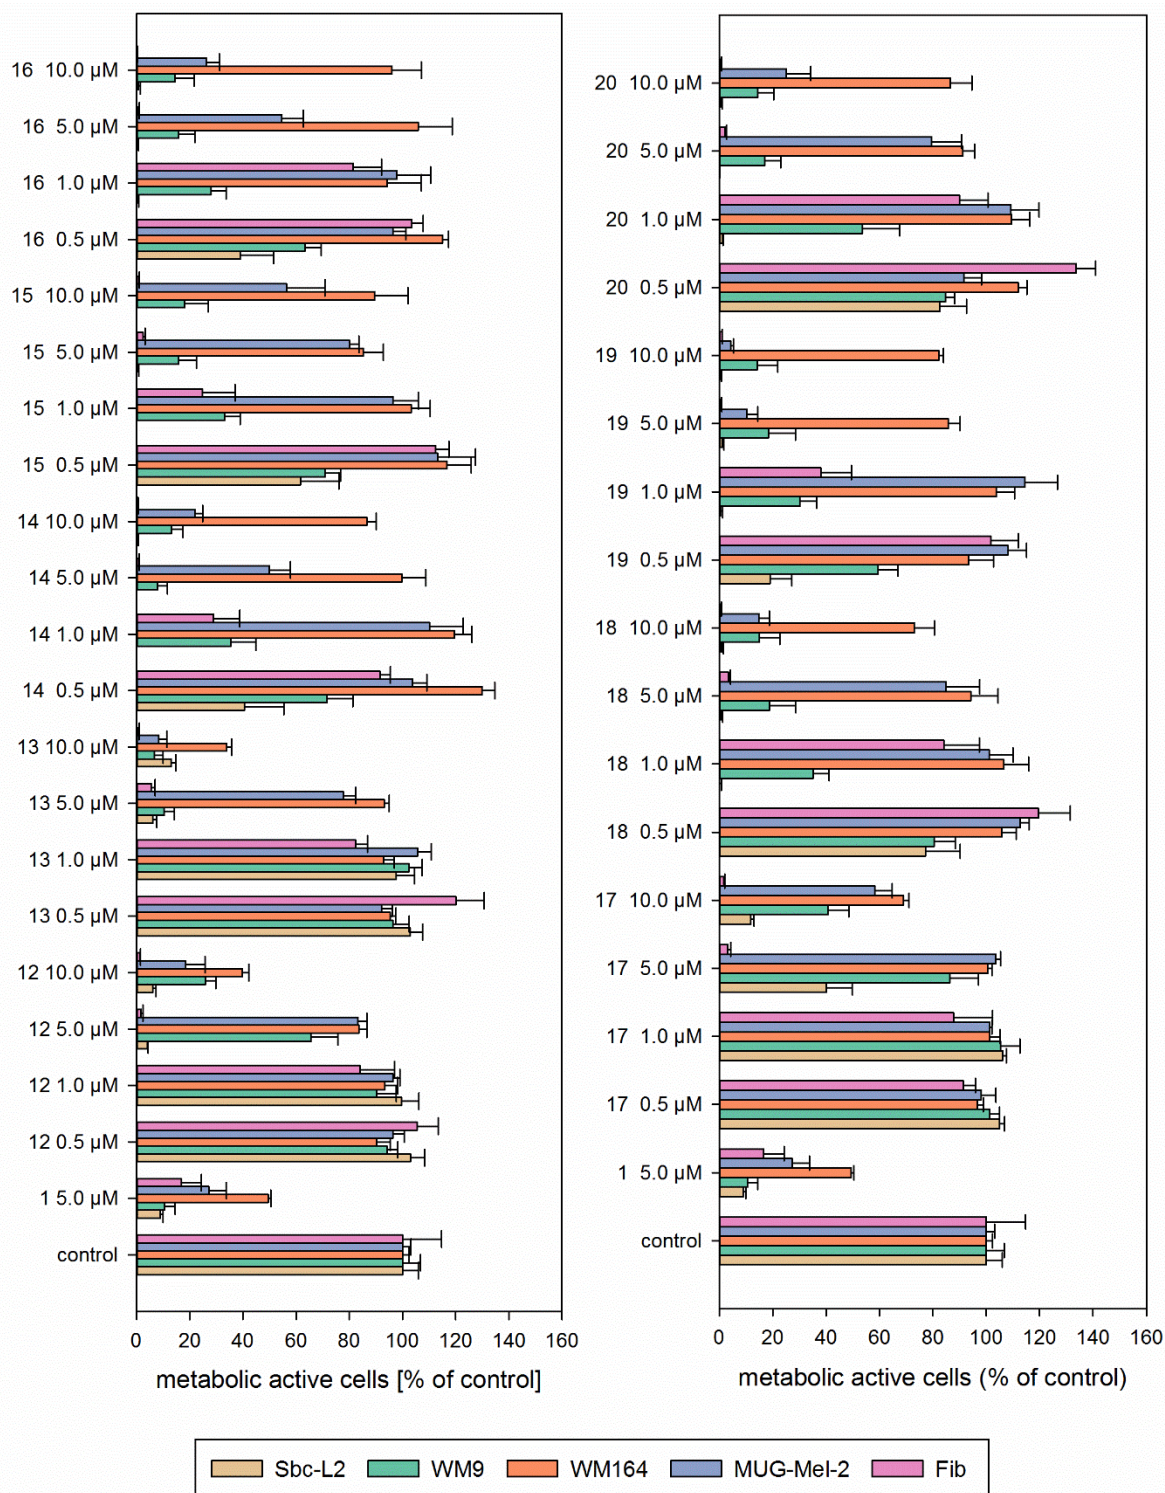

323

324 **Figure S3.** Results of the XTT assay of different concentrations of compounds **12-20** towards  
 325 melanoma cells from non-metastatic (SBcl2) and metastatic lesions (WM9, WM164, MUG-Mel2) and  
 326 skin fibroblasts (Fib) after 72 h of treatment (mean ± SEM, n = 4) and in comparison to 5.0 μM of **1**.
